# Supplementary material for: Prevalence and treatment of chronic musculoskeletal pain focused on service gaps: a comparative analysis by age group and body part
Source: PeerJ journal article supplement (doi:10.7717/peerj.18389), 2024-10-28
Supplement: Data.xlsx [file Data.xlsx]

## Sheet: 1;group～q4_8
no	group	Their sex_1_men_2_women	age	age-group_1_20s_2_30s_3_40s_4_50s_5_60s_6_70s	q1_ chronic pain_neck_1_Available_2_Not available	q1_chronic pain_shoulder1_Available_2_Not available	q1_chronic pain_elbow1_Available_2_Not available	q1_chronic pain_wrist/hand1_Available_2_Not available	q1_chronic pain_lower back1_Available_2_Not available	q1_chronic pain_hip joint1_Available_2_Not available	q1_chronic pain_knee1_Available_2_Not available	q1_chronic pain_ancle/foot1_Available_2_Not available	q2_treatment_neck_hospital_0_Not available_1_Available	q2_treatment_neck_rehabilitation_0_Not available_1_Available	q2_treatment_neck_osteopathy clinics_0_Not available_1_Available	q2_treatment_neck_massage_0_Not available_1_Available	q2_treatment_neck_self-management_0_Not available_1_Available	q2_treatment_neck_not treatment_0_Not available_1_Available	q2_treatment_shoulder_hospital_0_Not available_1_Available	q2_treatment_shoulder_rehabilitation_0_Not available_1_Available	q2_treatment_shoulder_osteopathy clinics_0_Not available_1_Available	q2_treatment_shoulder_massage_0_Not available_1_Available	q2_treatment_shoulder_self-management_0_Not available_1_Available	q2_treatment_shoulder_not treatment_0_Not available_1_Available	q2_treatment_elbow_hospital_0_Not available_1_Available	q2_treatment_elbow_rehabilitation_0_Not available_1_Available	q2_treatment_elbow_osteopathy clinics_0_Not available_1_Available	q2_treatment_elbow_massage_0_Not available_1_Available	q2_treatment_elbow_self-management_0_Not available_1_Available	q2_treatment_elbow_not treatment_0_Not available_1_Available	q2_treatment_wrist/hand_hospital_0_Not available_1_Available	q2_treatment_wrist/hand_rehabilitation_0_Not available_1_Available	q2_treatment_wrist/hand_osteopathy clinics_0_Not available_1_Available	q2_treatment_wrist/hand_massage_0_Not available_1_Available	q2_treatment_wrist/hand_self-management_0_Not available_1_Available	q2_treatment_wrist/hand_not treatment_0_Not available_1_Available	q2_treatment_lower back_hospital_0_Not available_1_Available	q2_treatment_lower back_rehabilitation_0_Not available_1_Available	q2_treatment_lower back_osteopathy clinics_0_Not available_1_Available	q2_treatment_lower back_massage_0_Not available_1_Available	q2_treatment_lower back_self-management_0_Not available_1_Available	q2_treatment_lower backnot treatment_0_Not available_1_Available	q2_treatment_hip joint_hospital_0_Not available_1_Available	q2_treatment_hip joint_rehabilitation_0_Not available_1_Available	q2_treatment_hip joint_osteopathy clinics_0_Not available_1_Available	q2_treatment_hip joint_massage_0_Not available_1_Available	q2_treatment_hip joint_self-management_0_Not available_1_Available	q2_treatment_hip joint_not treatment_0_Not available_1_Available	q2_treatment_knee_hospital_0_Not available_1_Available
1	9	2	48	3	1	1	2	2	1	2	2	2	1	0	0	0	0	0	0	0	0	0	0	1													0	0	0	0	0	1
2	7	2	28	1	2	2	2	2	2	2	2	2
3	12	2	71	6	2	2	2	2	2	2	2	2	0	0	0	0	0	1																															0
4	3	1	49	3	1	1	2	2	1	2	2	2	0	0	0	0	1	0	0	0	0	0	1	0													0	0	0	0	1	0
5	5	1	69	5	1	1	2	2	2	2	1	2	0	0	0	1	0	0	0	0	0	1	0	0																									1
6	2	1	37	2	2	2	2	2	2	2	2	2
7	2	1	37	2	2	2	2	2	2	2	2	2
8	11	2	67	5	1	1	2	2	1	2	1	2	0	0	0	0	1	0	0	0	0	0	1	0													0	0	0	0	1	0							0
9	6	1	73	6	2	2	2	2	2	2	2	2	0	0	0	0	0	1
10	2	1	34	2	2	2	2	2	2	2	2	2
11	5	1	67	5	2	2	2	2	2	2	2	2
12	1	1	27	1	2	2	2	2	2	2	2	2
13	10	2	56	4	2	2	2	2	2	2	2	2
14	3	1	43	3	2	2	2	2	2	2	2	2
15	2	1	34	2	2	2	2	2	2	2	2	2
16	9	2	45	3	2	2	2	2	2	2	2	2	0	0	0	0	1	0	0	0	0	0	1	0													0	0	0	0	1	0
17	3	1	46	3	2	2	2	2	2	2	2	2	0	0	0	0	0	1																			0	0	0	0	0	1	0	0	0	0	0	1
18	3	1	45	3	2	1	2	2	1	2	2	2							0	0	0	0	1	0													1	0	0	0	1	0
19	3	1	40	3	1	1	2	2	1	2	2	2	0	0	1	0	0	0	0	0	1	0	0	0													0	0	1	0	0	0
20	5	1	62	5	2	2	2	2	2	2	2	2	0	0	0	0	0	1	0	0	0	0	0	1
21	10	2	52	4	2	2	2	2	2	2	2	2
22	3	1	45	3	1	1	2	2	1	2	2	2	0	0	0	0	1	0	0	0	0	0	1	0													0	0	0	0	1	0
23	6	1	73	6	2	2	2	2	2	2	2	2
24	9	2	48	3	2	2	2	2	2	2	2	2
25	4	1	52	4	2	2	2	2	2	2	2	2													1	0	0	0	0	0	0	0	0	0	0	1	1	1	0	0	0	0
26	4	1	53	4	2	2	2	2	2	2	2	2
27	9	2	45	3	2	2	2	2	2	2	2	2
28	2	1	34	2	2	2	2	2	2	2	2	2
29	7	2	25	1	1	1	2	2	2	1	2	2	0	0	0	1	0	0	0	0	0	1	0	0																			0	0	0	0	0	1
30	9	2	48	3	2	2	2	1	2	1	2	1	0	0	0	0	0	1	0	0	0	0	0	1	1	0	0	0	0	0	1	1	0	0	0	0	0	0	0	0	0	1	1	0	0	0	0	0	1
31	11	2	61	5	2	2	2	2	1	2	2	2							0	0	0	0	0	1													1	0	0	0	0	0
32	1	1	29	1	2	1	2	2	1	2	1	2							0	0	0	0	1	0													0	0	0	0	1	0							0
33	5	1	68	5	2	2	2	2	2	2	2	2																			1	0	0	0	0	0	1	0	0	0	0	0
34	4	1	57	4	2	2	2	2	1	2	2	2																			0	0	0	0	1	0	0	0	0	0	1	0
35	3	1	48	3	2	2	2	2	1	2	2	2																									0	0	0	0	0	1
36	4	1	57	4	2	2	2	2	2	2	2	2							1	1	0	1	1	0
37	2	1	33	2	2	2	2	2	2	2	2	2													0	0	0	0	0	1
38	1	1	21	1	2	2	2	2	2	2	2	2							1	1	0	1	1	0													1	1	0	1	1	0
39	4	1	52	4	2	1	2	2	1	1	2	1	1	0	1	1	1	0	0	0	1	0	0	0							1	0	0	0	0	0	0	0	1	0	0	0	0	0	0	0	0	1
40	4	1	59	4	2	2	2	2	2	2	2	2
41	4	1	50	4	2	2	2	2	2	2	2	2																									0	0	1	0	0	0							0
42	7	2	26	1	2	2	2	2	2	2	2	2
43	11	2	69	5	2	2	2	2	2	2	2	2																									1	0	1	1	1	0
44	1	1	22	1	2	2	2	2	1	2	1	2																									0	0	0	0	0	1							0
45	9	2	47	3	2	2	2	2	2	2	2	2							0	0	0	0	1	0
46	9	2	40	3	2	2	2	2	2	2	2	2																									0	0	1	0	0	0
47	7	2	29	1	2	2	2	2	2	2	2	2	0	0	0	0	0	1							0	0	0	0	0	1	0	0	0	0	0	1	0	0	0	0	0	1	0	0	0	0	0	1	0
48	1	1	24	1	2	2	2	2	2	2	2	2
49	2	1	35	2	2	2	2	2	1	2	2	2																									0	0	0	0	1	0
50	10	2	52	4	2	2	2	2	2	2	2	2
51	5	1	61	5	1	1	2	2	2	2	2	2	0	0	1	0	0	0	0	0	1	0	0	0
52	5	1	67	5	2	2	2	2	2	2	2	2																									1	0	0	0	1	0
53	6	1	71	6	2	2	2	2	2	2	2	2																			0	0	0	0	1	0
54	11	2	61	5	2	2	2	2	2	2	2	2
55	11	2	66	5	2	2	2	2	2	2	2	2	0	0	0	0	1	0	0	0	0	0	1	0													0	0	0	0	1	0
56	11	2	62	5	1	1	2	2	1	2	2	2	1	1	1	0	0	0	1	1	1	0	0	0													1	0	0	0	0	0
57	1	1	22	1	2	2	2	2	2	2	2	2
58	9	2	44	3	1	1	2	2	2	2	2	2	0	0	0	0	0	1	0	0	0	0	0	1	0	0	0	0	0	1	0	0	0	0	0	1	0	0	0	0	0	1	0	0	0	0	0	1	0
59	8	2	34	2	1	1	2	2	2	2	2	2	0	0	0	0	1	0	0	0	0	0	1	0
60	11	2	63	5	1	1	2	2	1	2	1	2	1	1	1	0	1	0	1	1	1	0	1	0													1	1	1	0	1	0							0
61	8	2	30	2	1	2	2	1	1	2	2	2	0	0	0	1	0	0													0	0	0	1	0	0	0	0	0	1	0	0
62	10	2	52	4	1	1	2	2	1	2	2	2	0	0	0	1	0	0	0	0	0	0	0	1													0	0	0	0	1	0
63	3	1	49	3	2	2	2	2	2	2	2	2
64	11	2	62	5	1	2	2	2	2	2	2	2	0	0	0	0	1	0
65	6	1	71	6	2	2	2	2	2	2	1	1																									1	0	0	1	0	0							0
66	9	2	44	3	2	2	2	2	2	2	2	2
67	11	2	63	5	2	2	2	2	1	2	2	2	0	0	0	0	0	1	0	0	0	0	0	1													1	0	0	0	0	0	0	0	0	0	0	1
68	1	1	27	1	1	1	2	2	2	2	2	2	0	0	0	0	1	0	0	0	0	0	1	0
69	8	2	35	2	2	2	2	2	2	2	2	2
70	5	1	66	5	2	2	2	2	2	2	2	2
71	10	2	52	4	2	2	2	2	2	2	2	2
72	6	1	78	6	2	2	2	2	2	2	2	2	0	0	0	0	1	0	0	0	0	0	1	0
73	5	1	68	5	2	2	2	1	2	2	1	2	0	0	0	0	1	0	0	0	0	0	1	0							0	0	0	0	1	0	0	0	0	0	1	0	0	0	0	0	1	0	0
74	5	1	60	5	2	2	2	2	2	2	2	2																									1	0	1	0	0	0
75	10	2	59	4	2	2	2	2	2	1	2	2																															1	0	0	0	0	0
76	8	2	33	2	2	2	2	2	2	2	2	2																									1	1	0	0	1	0
77	4	1	59	4	1	1	2	2	1	2	2	2	0	0	0	0	0	1	0	0	0	0	0	1							0	0	0	0	0	1	0	0	0	0	0	1							0
78	1	1	29	1	2	2	2	2	2	2	2	2							0	0	0	0	0	1													0	0	0	0	0	1	0	0	0	0	0	1	0
79	5	1	66	5	2	1	1	2	1	2	1	2							0	0	0	0	1	0	1	0	0	0	0	0							1	0	0	0	0	0							0
80	3	1	45	3	2	2	2	2	2	2	2	2
81	2	1	36	2	2	2	2	2	2	2	2	2
82	8	2	39	2	2	2	2	2	2	1	2	2																															0	0	0	0	0	1
83	9	2	48	3	2	2	2	2	2	2	2	2
84	3	1	46	3	2	2	2	2	2	2	2	2																									1	0	0	0	0	0
85	11	2	66	5	2	2	2	2	2	2	2	2
86	4	1	56	4	2	2	2	2	2	2	2	2
87	3	1	47	3	1	1	2	2	2	2	2	2	0	0	1	0	1	0	0	0	1	0	1	0
88	1	1	28	1	2	2	2	2	2	2	2	2
89	5	1	60	5	2	2	2	2	2	2	2	2																			1	0	0	0	0	0
90	12	2	70	6	2	2	2	2	2	2	2	2
91	9	2	48	3	2	2	2	1	1	2	2	2																			0	0	0	0	1	0	1	0	0	0	0	0
92	6	1	73	6	2	2	2	2	2	2	2	2
93	3	1	47	3	2	2	2	2	1	2	2	2																									0	0	0	0	0	1
94	2	1	35	2	2	2	2	2	2	1	2	2																									0	0	0	0	0	1	0	0	0	0	0	1
95	8	2	37	2	1	1	2	2	2	1	1	2	0	0	0	0	0	1	0	0	0	0	0	1							0	0	0	0	0	1							0	0	0	0	0	1	0
96	12	2	75	6	2	1	2	2	2	2	2	2							1	0	0	0	0	0													1	0	0	0	0	0
97	10	2	51	4	2	2	2	2	2	2	2	1																									1	0	0	0	0	0
98	12	2	71	6	2	1	2	2	2	2	2	2							0	0	0	0	1	0																									0
99	3	1	43	3	1	2	2	1	2	2	1	1	0	0	0	0	1	0													0	0	0	0	1	0													0
100	1	1	27	1	2	2	2	2	2	2	2	2
101	12	2	71	6	2	2	2	2	2	2	2	2							1	1	0	0	0	0							1	1	0	0	0	0
102	5	1	67	5	2	2	2	2	2	2	2	2	0	0	0	0	0	1	0	0	0	0	0	1													0	0	0	0	0	1							0
103	9	2	48	3	1	2	2	2	2	2	2	2	0	0	0	0	1	0
104	12	2	70	6	2	2	2	2	2	2	2	2
105	11	2	62	5	2	2	2	2	2	2	2	2
106	8	2	31	2	2	2	2	2	2	2	2	2													1	0	0	0	0	0
107	7	2	21	1	2	2	2	2	2	2	2	2
108	1	1	27	1	2	2	2	2	2	2	2	2
109	11	2	64	5	2	2	2	2	2	2	2	2	0	0	0	0	0	1	0	0	0	0	0	1
110	10	2	57	4	2	2	2	2	2	2	2	2							0	0	0	0	0	1													0	0	0	0	0	1	0	0	0	0	0	1	0
111	5	1	69	5	2	2	2	2	2	2	2	2													0	0	0	0	0	1							0	0	0	0	0	1							0
112	2	1	36	2	2	2	2	2	2	2	2	2
113	3	1	41	3	1	2	2	2	2	2	2	2	0	0	0	0	1	0																			0	0	0	0	1	0
114	11	2	60	5	2	2	2	2	2	2	1	2																																					0
115	8	2	35	2	2	2	2	2	2	2	2	2
116	3	1	44	3	2	2	2	2	2	2	2	2
117	7	2	29	1	2	1	2	2	2	2	2	2							0	0	0	0	0	1
118	9	2	45	3	2	2	2	2	2	2	2	2
119	6	1	73	6	2	2	2	2	2	2	2	2
120	5	1	64	5	2	2	2	2	2	2	2	2
121	2	1	35	2	2	2	2	2	2	2	2	2
122	4	1	57	4	2	2	2	2	2	2	2	2	1	0	0	1	0	0	0	0	0	1	0	0
123	7	2	29	1	2	2	2	2	2	2	2	2
124	3	1	47	3	2	2	2	2	2	2	2	2																									0	0	0	0	1	0
125	4	1	58	4	2	2	2	2	1	2	2	2																									1	0	1	1	1	0
126	11	2	63	5	2	2	2	2	2	2	2	2	0	0	1	0	0	0	0	0	1	0	0	0													0	0	1	0	0	0	0	0	1	0	0	0	0
127	11	2	64	5	2	2	2	2	2	2	2	2							0	0	0	0	0	1
128	3	1	47	3	1	1	2	2	1	1	2	2	1	1	1	1	1	0	1	1	1	1	1	0													1	1	1	1	1	0	1	1	1	1	1	0
129	12	2	76	6	2	1	2	2	1	2	1	2							0	0	0	0	1	0													0	0	0	1	0	0							0
130	11	2	61	5	2	2	2	2	2	2	2	2	1	0	0	0	0	0	1	0	0	0	0	0							1	0	0	0	0	0							1	0	0	0	0	0
131	11	2	62	5	2	2	2	2	2	2	2	2	0	0	0	1	1	0	0	0	0	1	1	0													0	0	0	1	1	0
132	7	2	25	1	2	2	2	2	2	2	2	2	0	0	1	0	0	0	0	0	1	0	0	0
133	11	2	61	5	2	2	2	2	2	2	2	2
134	3	1	47	3	2	2	2	2	2	2	2	2	1	1	0	1	1	0	1	0	0	1	1	0													0	0	0	1	1	0
135	6	1	78	6	2	2	2	2	2	2	2	2
136	7	2	21	1	2	2	2	2	2	2	2	2
137	10	2	51	4	2	2	2	2	2	2	2	2
138	12	2	74	6	2	2	2	2	2	2	2	2
139	4	1	54	4	2	2	2	2	2	2	2	2
140	9	2	45	3	2	2	2	2	2	2	2	2
141	4	1	56	4	2	2	2	2	2	2	2	2
142	2	1	34	2	2	2	2	2	2	2	2	2
143	4	1	53	4	2	2	2	2	2	2	2	2							0	0	1	0	0	0																									1
144	10	2	58	4	2	2	2	2	2	2	2	2							0	0	0	0	1	0							0	0	0	0	1	0	0	0	0	0	1	0
145	12	2	70	6	2	1	2	2	2	2	2	2	0	0	0	0	1	0	0	0	0	0	1	0							0	0	0	0	1	0	0	0	0	0	1	0
146	7	2	26	1	2	2	2	2	2	2	2	2
147	12	2	75	6	2	2	2	2	2	2	2	2																									1	0	0	0	0	0
148	8	2	31	2	2	2	2	2	2	2	2	2
149	1	1	24	1	1	1	2	2	2	2	2	2	1	0	0	0	0	0	1	0	0	0	0	0
150	11	2	68	5	2	2	2	2	2	2	2	2							1	0	0	0	0	0													0	0	0	0	0	1							0
151	1	1	28	1	2	2	2	2	2	2	2	2
152	9	2	43	3	2	2	2	2	2	2	2	2
153	4	1	57	4	2	2	2	2	2	2	2	2	1	0	0	1	1	0	1	0	0	1	0	0													1	0	0	1	0	0
154	12	2	75	6	2	2	2	2	2	2	2	2
155	10	2	56	4	2	2	2	2	2	2	2	2
156	8	2	31	2	2	2	2	2	2	2	2	2
157	8	2	33	2	1	1	2	2	1	2	1	2	0	0	0	0	1	0	0	0	1	1	1	0													0	0	0	0	0	1							0
158	3	1	48	3	2	2	2	2	2	2	2	2																									0	0	0	0	1	0
159	8	2	38	2	2	2	2	2	2	2	2	2
160	6	1	75	6	2	2	2	2	2	2	2	2
161	5	1	65	5	2	2	2	2	2	2	2	2
162	6	1	78	6	2	2	2	2	2	2	2	2
163	4	1	50	4	2	2	2	2	2	2	2	1
164	3	1	46	3	2	2	1	2	1	2	2	2													0	0	0	0	1	0							0	0	0	0	1	0
165	4	1	59	4	2	2	2	2	2	2	2	2
166	6	1	73	6	2	2	2	2	2	2	2	2																																					0
167	3	1	40	3	2	2	2	2	2	2	2	2
168	11	2	68	5	2	2	2	2	2	2	2	2
169	10	2	56	4	2	2	2	2	2	2	2	2
170	6	1	73	6	2	2	2	2	2	1	2	2							1	1	1	0	0	0													1	1	1	1	1	0	0	0	0	0	0	1
171	9	2	47	3	2	2	2	2	2	2	2	2
172	6	1	72	6	2	2	2	2	2	2	1	2													1	0	0	0	0	0							0	0	0	0	0	0							1
173	8	2	36	2	2	2	2	2	2	2	2	2
174	9	2	40	3	2	2	2	2	2	2	2	2																																					1
175	8	2	31	2	2	2	2	2	2	2	2	2
176	11	2	69	5	2	2	2	2	2	2	2	2																									1	0	0	0	0	0
177	7	2	28	1	1	1	2	2	2	2	1	1	1	1	0	0	0	0	1	1	0	0	0	0																									1
178	2	1	38	2	2	2	2	2	2	2	2	2
179	4	1	55	4	2	2	2	2	2	2	2	2
180	1	1	23	1	1	2	2	2	2	2	2	2	1	0	0	1	0	0	1	1	0	1	0	0
181	8	2	31	2	1	1	2	2	1	2	2	2	0	0	0	1	1	0	0	0	0	1	1	0													0	0	0	1	1	0
182	9	2	44	3	1	1	2	2	1	2	2	2	0	0	0	0	1	0	0	0	0	0	1	0													0	0	0	0	1	0
183	10	2	55	4	2	2	2	2	2	2	2	2
184	8	2	38	2	1	1	2	2	1	2	1	1	0	0	0	0	0	1	0	0	0	0	1	0													0	0	0	0	0	1							0
185	5	1	64	5	2	1	2	2	2	2	2	2							0	0	0	0	0	1													1	1	0	0	0	0
186	11	2	61	5	2	2	2	2	2	2	2	2
187	5	1	60	5	2	2	2	2	2	2	2	2
188	6	1	76	6	2	2	2	2	2	2	2	2
189	2	1	34	2	2	2	2	2	2	2	2	2
190	11	2	63	5	2	2	2	2	2	2	2	1																									0	0	0	0	1	0
191	1	1	25	1	2	2	2	2	2	2	2	2
192	10	2	50	4	2	2	2	2	2	2	2	2	0	0	0	0	1	0	0	0	0	0	1	0													1	1	0	0	1	0
193	8	2	37	2	2	2	2	2	2	2	2	2
194	6	1	71	6	1	2	2	2	1	2	2	2	1	1	1	1	1	0																			1	1	1	1	1	0
195	5	1	61	5	2	2	2	2	1	1	2	2																									0	0	1	0	1	0	0	0	0	0	1	0
196	2	1	33	2	1	2	1	2	2	2	2	1	1	0	0	0	0	0							0	0	0	0	0	0							1	0	0	0	0	0	1	0	0	0	0	0	1
197	12	2	76	6	2	2	2	2	2	2	2	2							1	0	0	0	0	0													1	0	0	0	0	0							0
198	11	2	69	5	1	1	2	2	1	2	2	1	0	0	0	0	1	0	0	0	0	0	1	0													1	1	0	0	1	0
199	2	1	34	2	1	1	2	2	2	2	2	2	0	0	0	0	1	0	0	0	0	0	1	0
200	6	1	73	6	2	2	2	2	2	2	2	2																									0	0	1	0	0	0
201	10	2	51	4	2	2	2	2	2	2	2	2
202	10	2	53	4	2	2	2	2	2	2	2	2
203	7	2	23	1	2	2	2	2	2	2	2	2																			0	0	0	0	1	0
204	6	1	73	6	2	2	2	2	2	2	2	2
205	6	1	70	6	2	2	2	2	2	2	2	1
206	10	2	50	4	1	1	2	2	1	2	2	2	0	0	0	0	1	0	0	0	0	0	1	0													0	0	0	0	0	1
207	8	2	30	2	2	2	2	2	2	2	2	2
208	11	2	61	5	2	2	2	2	2	2	2	2
209	2	1	38	2	2	2	2	2	2	2	2	2							0	0	0	0	0	1													0	0	0	0	0	1
210	5	1	62	5	2	2	2	2	2	2	2	2
211	4	1	52	4	2	2	2	2	2	2	2	2
212	10	2	51	4	2	2	2	2	2	2	2	2
213	4	1	53	4	2	2	2	2	2	2	2	2
214	6	1	72	6	2	2	2	1	1	2	2	2																			1	0	0	0	0	0	1	1	0	0	0	0
215	3	1	48	3	2	2	2	2	2	2	2	2																									0	0	0	0	0	1
216	6	1	70	6	2	2	2	2	2	2	2	2																																					1
217	3	1	41	3	2	2	2	2	2	2	2	2
218	4	1	59	4	2	2	2	2	2	2	2	2
219	5	1	64	5	2	2	2	2	2	2	2	2							0	0	0	0	0	1							1	0	0	0	0	0	1	0	0	0	0	0	0	0	0	0	0	1	1
220	11	2	66	5	2	2	2	2	2	2	2	2							1	1	1	0	1	0
221	10	2	56	4	2	2	2	2	2	2	2	2
222	8	2	30	2	2	2	2	2	1	2	1	1							0	0	1	1	1	0							1	0	0	0	0	0	1	1	1	1	1	0							1
223	10	2	50	4	1	1	2	2	1	1	2	1	0	0	0	0	0	1	0	0	0	0	0	1													0	0	0	0	0	1	0	0	0	0	0	1
224	6	1	79	6	2	2	2	2	2	2	2	2	0	0	0	0	1	0	0	0	0	0	1	0													0	0	0	0	1	0
225	3	1	49	3	2	2	2	2	2	2	2	2
226	3	1	44	3	2	2	2	2	2	2	2	2
227	4	1	51	4	1	1	2	2	1	2	2	2	0	0	0	0	0	1	0	0	0	0	0	1													1	0	0	0	0	0
228	3	1	43	3	2	2	2	2	2	2	2	2
229	9	2	41	3	2	2	2	2	2	2	2	2	0	0	0	1	1	0	0	0	0	1	1	0													0	0	0	1	1	0	0	0	0	1	1	0	0
230	4	1	52	4	2	2	2	2	2	2	1	2																																					0
231	4	1	57	4	2	2	2	2	2	2	2	2
232	8	2	38	2	2	2	2	2	2	2	2	2
233	4	1	58	4	2	2	2	2	2	2	2	2							1	0	0	0	0	0	1	0	0	0	0	0	1	0	0	0	0	0
234	10	2	57	4	2	2	2	2	2	2	2	2																															0	0	0	0	0	1
235	5	1	65	5	2	2	2	2	2	2	2	2
236	1	1	29	1	2	2	2	2	2	2	2	2
237	3	1	49	3	1	1	2	2	1	2	2	2	0	0	0	0	1	0	0	0	0	0	1	0													0	0	1	0	1	0
238	5	1	64	5	1	1	2	2	1	1	1	1	0	0	1	1	0	0	0	0	1	1	1	0													0	0	1	1	1	0	0	0	1	1	0	0	0
239	1	1	28	1	2	2	2	2	2	2	2	2
240	8	2	39	2	1	1	2	2	1	2	2	2	0	0	0	0	1	0	0	0	0	0	1	0													0	0	0	0	1	0
241	10	2	54	4	2	2	2	2	2	2	2	2	0	0	0	0	0	1	0	0	0	0	0	1	0	0	0	0	0	1	0	0	0	0	0	1	0	0	0	0	0	1	0	0	0	0	0	1	0
242	1	1	24	1	2	2	2	2	1	1	2	2	1	0	0	0	0	0	1	0	0	0	0	0							1	0	0	0	0	0	1	0	0	0	0	0	1	0	0	0	0	0	1
243	9	2	45	3	2	2	2	2	1	2	2	2																									0	0	0	0	0	1
244	1	1	24	1	2	2	2	2	2	2	2	2
245	1	1	29	1	2	2	2	2	2	2	2	2
246	2	1	32	2	1	2	1	2	2	2	2	2	1	0	1	0	0	0	0	0	0	1	1	0	0	0	0	0	0	0																			0
247	5	1	62	5	2	2	2	2	2	2	2	2																									1	1	0	0	0	0
248	1	1	22	1	2	2	2	2	1	2	2	2	0	0	0	0	1	0																			0	0	0	0	1	0
249	1	1	21	1	2	2	2	2	2	2	2	2
250	2	1	39	2	2	2	2	2	2	2	2	2
251	9	2	47	3	2	2	2	2	2	2	2	2
252	2	1	32	2	2	2	2	2	1	2	2	2																									0	0	0	0	0	1
253	4	1	52	4	1	1	1	1	1	2	2	1	1	1	1	1	1	0	1	1	1	1	1	0	0	0	0	0	1	0	0	0	0	0	0	1	1	1	0	0	1	0	0	0	0	0	0	1	0
254	5	1	69	5	2	2	2	2	2	2	2	2
255	5	1	61	5	2	2	2	2	1	2	2	2																									0	0	0	0	1	0
256	8	2	38	2	2	2	2	2	2	2	2	2
257	6	1	72	6	2	2	2	2	2	2	2	2
258	6	1	75	6	2	2	2	2	2	2	2	2
259	5	1	65	5	2	2	2	2	2	2	2	2
260	11	2	65	5	2	2	2	2	2	2	2	2
261	5	1	60	5	2	2	2	2	2	2	2	2
262	3	1	47	3	2	2	2	2	2	2	2	2
263	1	1	22	1	2	2	2	2	2	2	2	2
264	12	2	72	6	2	2	2	2	2	2	2	2
265	8	2	34	2	2	2	2	1	1	2	2	2																			0	0	0	0	1	0	0	0	0	0	0	1
266	2	1	39	2	2	2	2	2	2	2	2	1
267	7	2	28	1	2	2	2	2	2	2	2	2
268	6	1	70	6	2	2	2	2	2	2	2	2
269	11	2	61	5	2	1	2	2	2	2	2	2							1	0	0	0	0	0
270	10	2	56	4	2	2	2	2	2	2	2	2																															0	0	0	0	0	1
271	5	1	66	5	2	2	2	2	2	2	2	2							1	0	0	0	0	0																									1
272	10	2	59	4	2	2	2	2	2	2	2	2													0	0	0	0	0	1	0	0	0	0	0	1							0	0	0	0	0	1	0
273	9	2	48	3	2	2	2	2	2	2	2	2							0	0	0	0	0	1
274	9	2	48	3	2	2	2	1	2	2	2	1																			0	0	0	0	0	1
275	4	1	50	4	2	2	2	1	2	2	2	2																			0	0	0	0	0	1
276	8	2	36	2	2	2	2	1	1	2	2	2																			0	0	0	0	0	1	0	0	0	0	1	0
277	9	2	42	3	2	2	2	2	2	2	2	2
278	9	2	42	3	2	2	2	2	2	2	2	2
279	12	2	74	6	2	2	2	2	2	2	2	2							0	0	0	0	1	0																									0
280	4	1	59	4	1	1	2	2	2	2	2	2	1	0	0	0	0	0	1	0	0	0	0	0
281	9	2	49	3	2	2	2	2	2	2	2	2	0	0	0	0	0	1	0	0	0	0	0	1													0	0	0	0	0	1
282	2	1	39	2	1	1	2	2	2	2	2	2	0	0	0	0	0	1	0	0	0	0	0	1
283	9	2	41	3	2	2	2	2	2	2	2	2
284	2	1	37	2	2	2	2	2	2	2	2	2							1	1	0	1	1	0
285	5	1	69	5	2	2	2	2	2	2	2	2
286	3	1	42	3	2	2	2	2	2	2	2	2
287	12	2	75	6	2	2	2	2	2	2	2	2																																					1
288	5	1	61	5	2	2	2	2	2	2	2	2
289	8	2	33	2	2	2	2	2	2	2	2	2
290	6	1	77	6	2	2	2	2	2	2	2	2
291	9	2	47	3	2	2	2	2	2	2	2	2
292	3	1	48	3	2	2	2	2	2	2	2	2																									1	0	0	0	1	0
293	8	2	30	2	2	2	2	2	2	2	2	2
294	1	1	25	1	2	2	2	2	2	2	2	2
295	2	1	34	2	1	1	2	2	1	2	1	2	0	0	0	0	1	0	0	0	0	0	1	0													0	0	0	0	1	0							0
296	2	1	34	2	2	2	2	2	2	2	2	2																									0	0	0	0	1	0
297	10	2	54	4	2	2	2	2	2	2	2	2	0	0	0	0	0	1	0	0	0	0	0	1													0	0	0	0	0	1							0
298	1	1	27	1	2	2	2	2	1	2	2	2																									1	1	0	0	1	0
299	7	2	28	1	2	2	2	2	2	2	2	2
300	8	2	31	2	2	2	2	1	2	2	2	2																			0	0	0	0	1	0
301	2	1	38	2	1	1	2	2	2	2	2	2	1	0	0	0	1	0	1	0	0	0	1	0
302	4	1	58	4	1	2	2	2	2	2	1	2	0	0	0	0	0	1																															0
303	11	2	66	5	2	2	2	2	2	2	2	2
304	9	2	43	3	2	2	2	2	2	2	2	2																			1	0	1	0	1	0
305	4	1	55	4	2	2	2	2	2	2	2	2
306	4	1	59	4	2	2	2	2	2	2	2	2
307	10	2	53	4	1	1	1	1	1	2	2	2	0	0	0	0	0	1	1	0	0	0	0	0	0	0	0	0	1	0	0	0	0	0	1	0	1	0	0	0	0	0							1
308	10	2	54	4	2	2	2	2	2	2	2	2
309	11	2	60	5	2	2	2	2	2	2	2	2	0	0	0	0	1	0	0	0	0	0	1	0							0	0	0	0	1	0	0	0	0	0	1	0							0
310	5	1	61	5	2	2	2	2	2	2	2	2
311	2	1	37	2	2	2	2	2	2	2	2	2
312	4	1	58	4	2	2	2	2	2	2	2	2	1	1	1	1	0	0	1	1	1	1	0	0							1	1	1	1	0	0	1	1	1	1	0	0
313	4	1	56	4	2	2	2	2	2	2	2	2																									1	0	0	0	0	0
314	5	1	66	5	2	2	2	2	2	2	2	2	0	0	0	0	0	1	0	0	0	0	0	1													1	1	0	0	0	0							0
315	5	1	60	5	2	2	2	2	2	2	2	2
316	12	2	71	6	2	2	2	2	2	2	2	2																									0	0	0	0	1	0
317	6	1	77	6	2	2	2	2	2	2	2	2																									1	0	0	0	1	0	0	0	0	0	0	1
318	4	1	54	4	1	2	2	2	1	2	2	2	1	1	0	0	1	0	0	0	0	0	1	0	0	0	0	0	1	0	0	0	0	0	1	0	1	1	0	0	1	0	0	0	0	0	1	0	0
319	10	2	51	4	2	2	2	2	2	2	2	2
320	3	1	44	3	2	2	2	2	1	2	2	2																									1	1	0	0	1	0
321	3	1	48	3	2	2	2	2	2	2	2	2
322	7	2	21	1	2	2	2	2	2	2	2	2
323	1	1	28	1	2	2	2	2	2	2	2	2							0	0	0	0	1	0
324	7	2	28	1	2	2	2	2	2	2	2	2	0	0	0	0	1	0	0	0	0	0	1	0													1	1	0	0	1	0
325	6	1	72	6	2	2	2	2	2	2	2	2
326	2	1	37	2	2	2	2	2	2	2	2	2
327	4	1	56	4	2	2	2	2	2	2	2	2
328	12	2	77	6	2	2	2	2	2	2	2	2																			1	0	0	0	1	0
329	3	1	42	3	2	2	2	2	2	2	2	2
330	11	2	67	5	2	2	2	1	1	2	2	2																			0	0	0	0	0	1	0	0	0	0	0	1
331	8	2	36	2	2	2	2	2	2	2	2	2																									1	1	1	0	1	0
332	6	1	70	6	2	2	2	2	2	2	2	2																									1	0	0	0	0	0
333	6	1	70	6	1	1	2	2	2	2	2	2	0	0	0	0	1	0	1	0	0	0	0	0													0	0	0	0	1	0
334	11	2	60	5	1	1	1	2	2	2	2	2	0	0	0	0	0	1	0	0	0	0	0	1	0	0	0	0	0	1							0	0	0	0	0	1
335	11	2	63	5	2	2	2	2	2	2	1	1							0	0	0	1	0	0							0	0	0	1	0	0	0	0	0	1	0	0	0	0	0	1	0	0	0
336	8	2	37	2	2	2	2	2	2	2	2	2	0	0	0	1	1	0	0	0	0	1	1	0
337	1	1	25	1	2	2	2	2	2	2	2	2
338	1	1	28	1	2	2	2	2	1	2	2	2																									0	0	0	0	1	0
339	7	2	20	1	1	1	1	1	1	1	1	1	1	1	0	0	0	0	1	0	0	0	0	0	1	1	0	0	0	0	1	0	0	0	0	0	1	0	0	0	0	0	1	0	0	0	0	0	1
340	2	1	35	2	2	2	2	1	1	2	1	1																			0	0	0	0	1	0	0	0	0	0	0	1							0
341	1	1	25	1	2	2	2	2	2	2	2	2
342	11	2	64	5	2	1	2	2	1	2	1	2							0	0	0	0	0	1													0	0	0	0	0	1							0
343	4	1	54	4	2	2	2	2	2	2	2	2
344	9	2	41	3	2	2	2	2	2	2	2	2
345	2	1	34	2	2	2	2	2	2	2	2	2
346	5	1	64	5	2	2	2	2	2	2	2	2													0	0	0	0	0	1	0	0	0	0	0	1							0	0	0	0	0	1	0
347	2	1	32	2	2	2	2	2	2	2	2	2
348	6	1	78	6	2	2	2	2	1	1	1	2	0	0	0	0	1	0	0	0	0	0	1	0													1	1	0	0	0	0	1	1	0	0	0	0	1
349	4	1	51	4	2	2	2	2	2	2	2	2
350	10	2	50	4	2	2	2	2	2	2	2	2
351	9	2	45	3	2	2	2	2	2	2	2	2							0	0	0	0	0	1
352	5	1	61	5	2	2	2	2	2	2	2	2																									1	0	0	0	0	0
353	8	2	36	2	1	1	2	2	1	2	2	2	0	0	1	0	0	0	0	0	1	0	0	0													0	0	1	0	0	0
354	12	2	71	6	2	2	2	2	2	2	1	2													1	1	1	0	1	0	1	1	1	0	0	0													0
355	4	1	55	4	2	2	2	2	2	2	2	2
356	8	2	35	2	2	2	2	2	2	2	2	2	0	0	1	0	0	0	0	0	1	0	0	0													0	0	1	0	0	0
357	5	1	60	5	1	1	2	2	2	2	2	2	0	0	0	0	1	0	0	0	0	0	1	0
358	1	1	29	1	2	2	2	2	2	2	2	2
359	7	2	27	1	2	2	2	2	2	2	2	2
360	4	1	59	4	1	2	2	2	1	2	1	2	0	0	0	0	1	0	0	0	0	0	1	0	0	0	0	0	1	0	0	0	0	0	1	0	0	0	0	0	1	0							0
361	7	2	28	1	2	2	2	2	2	2	2	2
362	9	2	48	3	2	2	2	2	2	2	2	2
363	2	1	38	2	2	2	2	2	2	2	2	2
364	10	2	54	4	2	2	2	2	2	2	2	2
365	8	2	39	2	2	1	2	1	2	1	1	2							1	0	0	0	0	0							0	0	0	0	0	0	0	0	1	0	1	0	0	0	0	1	0	0	0
366	5	1	64	5	2	2	2	2	2	2	2	2																									0	0	0	0	0	1
367	2	1	31	2	2	2	2	2	2	2	2	2
368	3	1	42	3	2	2	2	2	2	2	2	2
369	8	2	35	2	2	2	2	2	2	2	2	2
370	1	1	27	1	2	2	2	2	2	2	2	2
371	11	2	60	5	2	2	2	2	2	2	2	2																			1	1	1	0	0	0
372	8	2	36	2	2	2	2	2	2	2	2	2
373	1	1	22	1	1	2	2	2	2	2	2	2	0	0	0	0	0	1
374	2	1	38	2	2	2	2	1	1	2	2	2																			1	0	0	0	1	0	1	0	0	1	1	0
375	12	2	75	6	2	2	2	2	2	2	2	2																																					0
376	5	1	61	5	2	2	2	2	2	2	2	2																																					0
377	8	2	37	2	2	2	2	2	2	2	2	2
378	11	2	61	5	2	2	2	2	2	1	2	2																															1	0	0	0	0	0
379	1	1	27	1	2	2	2	2	2	2	2	2
380	7	2	26	1	2	2	2	2	2	2	2	2
381	3	1	49	3	2	2	2	2	2	2	2	2							0	0	0	0	0	1
382	4	1	54	4	2	2	2	2	2	2	2	2	1	1	0	0	1	0	1	1	0	0	1	0	1	0	0	0	1	0	1	1	0	0	1	0	0	0	1	1	1	0							1
383	4	1	50	4	2	2	2	2	1	2	1	2																									0	0	0	1	0	0							0
384	10	2	57	4	1	1	2	2	2	2	2	2	0	0	0	0	1	0	0	0	0	0	1	0																									0
385	2	1	33	2	2	2	2	2	2	2	2	2
386	5	1	66	5	1	2	2	1	1	1	2	2	1	0	0	0	0	0													1	0	0	0	0	0	1	0	0	0	0	0	1	0	0	0	0	0
387	8	2	33	2	1	1	2	2	1	2	2	1	0	0	0	0	0	1	0	0	0	0	1	0													0	0	0	0	1	0
388	5	1	60	5	2	2	2	2	2	2	2	2							0	0	0	0	0	1
389	4	1	59	4	2	1	2	2	2	2	2	2							1	0	0	0	0	0
390	12	2	71	6	2	2	2	2	2	2	2	2																									1	1	0	0	0	0
391	9	2	41	3	1	1	2	2	1	2	2	2	1	0	0	0	0	0	1	0	0	0	0	0													1	0	0	0	0	0
392	1	1	27	1	2	2	2	2	2	2	2	2
393	3	1	40	3	2	2	2	2	1	1	2	1																									0	0	0	0	1	0	0	0	0	0	1	0
394	11	2	60	5	2	1	2	2	1	2	2	2							1	1	0	0	0	0							0	0	0	0	0	1	1	1	0	0	0	0
395	5	1	66	5	2	2	2	2	2	2	2	2																																					1
396	9	2	44	3	2	2	2	2	2	2	2	2
397	9	2	44	3	2	2	2	2	2	2	2	2	1	0	0	0	0	0	1	0	0	0	0	0													1	0	0	0	0	0
398	3	1	46	3	2	2	2	2	2	2	2	2
399	9	2	46	3	2	2	2	2	2	2	2	2
400	8	2	37	2	2	2	2	2	2	2	2	2
401	12	2	79	6	2	2	2	2	1	2	2	2																									0	0	0	0	0	0
402	2	1	38	2	2	2	2	2	2	2	2	2
403	6	1	76	6	2	2	2	2	2	2	2	2																			1	1	0	0	0	0
404	12	2	74	6	1	1	2	2	2	2	2	2	1	0	1	0	0	0	1	0	1	0	0	0																			1	0	0	0	0	0	1
405	10	2	56	4	1	2	2	2	2	2	2	2	1	0	0	0	0	0	1	1	0	0	0	0							1	0	0	0	0	0	0	0	0	0	1	0							0
406	11	2	61	5	2	2	2	2	2	2	2	2
407	12	2	78	6	2	2	2	2	2	2	2	2																																					1
408	1	1	28	1	2	1	2	2	2	2	2	2							1	0	1	0	0	0													1	0	1	0	0	0
409	10	2	56	4	1	1	2	2	1	1	1	2	0	0	0	1	0	0	0	0	0	1	0	0													0	0	0	1	0	0	0	0	0	1	0	0	0
410	6	1	75	6	2	2	2	2	2	2	2	2							0	0	0	0	1	0													0	0	0	0	1	0
411	3	1	40	3	2	2	2	2	2	2	2	2																																					0
412	5	1	65	5	2	2	2	2	2	2	2	2							0	0	0	0	0	1
413	12	2	72	6	2	2	2	2	2	2	2	2																									1	0	0	0	1	0
414	7	2	27	1	2	2	1	2	2	2	2	2													0	0	0	0	0	0
415	4	1	57	4	2	2	2	2	2	2	2	2
416	3	1	44	3	2	2	2	2	2	2	2	2	1	1	0	0	0	0	1	1	0	0	0	0							1	0	0	0	0	0	1	1	0	0	0	0
417	4	1	53	4	2	1	2	2	2	2	1	2							0	0	0	0	1	0																									1
418	9	2	41	3	2	1	2	2	2	2	2	2							0	0	0	1	0	0
419	6	1	73	6	2	2	2	2	2	2	2	2
420	8	2	34	2	2	2	2	2	2	2	2	2							0	0	0	0	1	0													0	0	0	0	1	0
421	4	1	55	4	2	2	2	2	2	2	2	2
422	8	2	30	2	1	1	2	2	2	2	2	2	0	0	1	1	0	0	0	0	1	1	0	0
423	1	1	21	1	2	2	2	2	2	2	2	2
424	12	2	72	6	2	2	2	2	2	2	2	2	0	0	0	0	0	0	0	0	0	0	0	0
425	2	1	39	2	2	2	2	2	2	2	2	2
426	6	1	76	6	2	2	2	2	2	2	2	2	0	0	1	0	1	0	0	0	1	0	1	0													0	0	1	1	1	0	0	0	0	0	1	0	0
427	5	1	62	5	2	2	2	2	2	2	2	2
428	4	1	58	4	2	2	2	2	2	2	2	2
429	12	2	74	6	2	2	2	2	2	2	2	2
430	10	2	50	4	2	2	2	2	2	2	2	2
431	4	1	58	4	2	2	2	2	2	2	2	2
432	4	1	55	4	2	2	2	2	2	2	2	2
433	9	2	43	3	2	2	2	2	2	2	2	2
434	8	2	32	2	2	2	2	2	2	2	2	2
435	11	2	60	5	2	2	2	2	2	2	2	2
436	4	1	51	4	2	2	2	2	2	2	2	2
437	2	1	36	2	1	1	2	2	2	2	2	2	1	1	1	1	1	0	1	1	1	1	1	0
438	2	1	38	2	2	2	2	2	2	2	2	2
439	6	1	74	6	2	2	2	2	2	2	2	2
440	1	1	28	1	2	2	2	1	2	2	2	2																			0	0	0	0	0	1
441	4	1	57	4	2	2	2	2	2	2	2	2							0	0	0	0	1	0													0	0	0	0	1	0
442	10	2	59	4	2	2	2	2	1	2	2	2																									1	0	0	0	0	0
443	3	1	49	3	2	2	1	2	2	2	2	2	1	0	0	0	0	0	1	1	0	0	0	0	1	0	0	0	0	0	1	0	0	0	0	0	1	1	0	0	0	0							1
444	1	1	27	1	1	2	2	2	1	1	2	2	0	0	0	0	0	1																			0	0	0	0	0	1	0	0	0	0	0	1
445	12	2	73	6	2	1	2	2	2	2	2	2							0	0	0	1	1	0													1	1	1	1	1	0							1
446	11	2	65	5	2	2	2	2	2	2	2	2	0	0	0	0	1	0	0	0	0	0	1	0													0	0	0	0	1	0	0	0	0	0	1	0
447	3	1	44	3	2	2	2	2	2	2	2	2
448	7	2	26	1	2	2	2	2	2	2	2	2
449	5	1	62	5	2	2	2	2	2	2	2	2
450	4	1	51	4	2	2	2	2	2	2	2	2
451	8	2	35	2	2	2	2	2	2	2	2	2	0	0	1	0	0	0	0	0	1	1	0	0													1	0	0	1	0	0
452	10	2	59	4	2	2	2	1	1	1	1	2																			0	0	0	0	0	1	0	0	0	0	1	0	1	0	0	0	0	0	1
453	2	1	38	2	1	1	2	2	1	2	2	2	0	0	1	1	0	0	0	0	1	1	0	0													0	0	1	1	0	0
454	5	1	60	5	2	2	2	2	2	2	2	2
455	9	2	40	3	2	2	2	2	2	2	2	2	0	0	0	0	0	1	0	0	0	0	0	1
456	11	2	60	5	2	2	2	2	2	2	2	2	0	0	0	0	0	1	0	0	0	0	0	1
457	12	2	74	6	2	2	2	2	2	2	2	2	1	1	0	0	0	0													1	1	0	0	0	0	1	1	0	0	0	0							1
458	3	1	48	3	2	2	2	2	2	2	2	2
459	7	2	25	1	2	2	2	2	1	1	1	1																									0	0	0	0	1	0	0	0	0	0	1	0	0
460	9	2	49	3	2	2	2	2	2	2	2	2																									1	0	0	1	1	0
461	4	1	58	4	2	2	2	2	2	2	2	2
462	4	1	51	4	2	2	2	2	2	2	2	2
463	11	2	64	5	1	1	2	2	1	2	2	1	0	0	0	0	1	0	0	0	0	0	1	0	1	0	0	0	1	0	0	0	0	0	1	0	1	0	1	0	1	0
464	12	2	72	6	2	2	2	2	2	2	2	2
465	3	1	47	3	2	2	2	2	2	2	2	2	0	0	0	0	0	1	0	0	0	0	0	1	0	0	0	0	0	1
466	2	1	35	2	2	2	2	2	1	2	2	2	0	0	0	0	0	1	0	0	0	0	0	1													0	0	1	0	0	0
467	3	1	49	3	2	2	2	2	2	2	2	2
468	8	2	38	2	2	2	2	2	2	2	2	2
469	3	1	45	3	2	2	2	2	2	2	2	2							0	0	0	0	0	1	0	0	0	0	0	1							0	0	0	0	0	1							0
470	12	2	73	6	2	2	2	2	1	2	2	2																									0	0	0	0	0	1
471	1	1	28	1	2	1	1	2	2	2	2	2	0	0	0	0	0	1	0	0	0	0	0	1	0	0	0	0	0	1
472	4	1	53	4	2	1	2	1	2	2	2	2							0	0	0	0	0	1	0	0	0	0	0	1	1	0	0	0	0	0	1	0	0	0	0	0							0
473	3	1	48	3	2	2	2	2	2	2	2	2
474	2	1	39	2	2	2	2	2	2	2	2	2
475	12	2	72	6	2	2	2	2	2	2	2	2																			0	0	0	0	1	0													0
476	2	1	36	2	2	2	2	2	1	2	2	2																									1	1	1	1	1	0
477	4	1	54	4	2	2	2	2	2	2	2	2
478	9	2	47	3	2	2	2	2	2	2	2	2	1	0	1	0	0	0	1	0	1	0	0	0							1	0	1	0	0	0	1	1	1	0	0	0
479	9	2	48	3	1	2	1	2	1	2	2	2	0	0	0	0	1	0	0	0	1	0	1	0	1	0	0	0	1	0							1	0	0	0	1	0
480	5	1	65	5	2	2	2	2	1	2	2	2	0	0	0	0	1	0	1	0	0	0	0	0													0	0	0	0	0	1							0
481	8	2	35	2	2	2	2	2	2	2	2	2
482	11	2	62	5	2	2	2	2	2	2	2	2	0	0	0	1	0	0	0	0	0	1	0	0	0	0	0	1	0	0
483	12	2	70	6	2	2	2	2	1	2	1	2	1	1	1	0	0	0	1	1	1	0	0	0													1	1	0	0	0	0	0	0	0	0	0	1	1
484	1	1	27	1	2	2	2	2	2	2	2	2
485	7	2	28	1	2	2	2	2	2	2	2	2							0	0	0	0	0	1
486	10	2	55	4	2	2	2	2	2	2	2	2																									0	0	0	0	1	0	0	0	0	0	0	1
487	2	1	35	2	1	1	2	2	2	2	2	2	0	0	0	1	0	0	0	0	0	1	0	0	0	0	0	1	0	0
488	9	2	40	3	1	2	2	1	2	2	2	2	1	1	1	1	0	0													1	1	1	1	0	0	1	1	1	1	0	0	1	1	1	1	0	0	1
489	6	1	74	6	1	1	2	2	2	2	2	2	0	0	0	1	0	0	0	0	0	1	0	0
490	5	1	64	5	2	2	2	2	2	2	2	2
491	2	1	31	2	2	2	2	2	2	2	2	2
492	3	1	43	3	2	1	2	2	2	2	2	2							0	0	0	0	0	1
493	7	2	26	1	2	1	2	2	1	2	2	2							0	0	0	0	0	1													0	0	0	0	0	1
494	11	2	68	5	2	2	2	2	2	2	1	2	0	0	0	1	0	0	1	0	0	0	0	0													1	0	0	0	0	0							1
495	1	1	21	1	2	2	2	2	2	2	2	2
496	8	2	34	2	2	2	2	2	2	2	2	2
497	7	2	28	1	2	2	2	2	2	2	2	2
498	9	2	48	3	2	2	2	2	2	2	2	2
499	7	2	28	1	2	2	2	2	2	2	2	2
500	1	1	22	1	2	2	2	2	2	2	2	2	0	0	0	0	1	0
501	7	2	22	1	2	2	2	1	2	2	2	2																			1	1	1	0	1	0
502	4	1	57	4	2	2	2	2	2	2	2	2	0	0	0	0	0	1	0	0	0	0	0	1													0	0	0	0	0	1
503	10	2	55	4	2	2	2	2	2	2	2	2							0	0	0	1	0	0
504	6	1	70	6	2	2	2	2	2	2	2	2																									1	1	0	0	0	0
505	12	2	70	6	2	2	2	2	2	2	2	2							1	0	0	0	1	0													1	0	0	0	1	0
506	7	2	27	1	2	2	2	2	2	2	2	2
507	4	1	58	4	2	2	2	2	2	2	2	2
508	9	2	42	3	2	2	2	2	2	2	2	2	1	0	0	0	0	0	0	0	1	1	0	0													0	0	1	1	0	0
509	10	2	56	4	2	2	2	2	2	2	2	2	1	0	0	0	0	0	1	0	0	0	0	0													1	0	0	0	0	0	1	0	0	0	0	0
510	8	2	39	2	2	1	2	2	2	2	2	2							0	0	0	1	0	0
511	2	1	36	2	2	2	2	2	2	2	2	2
512	8	2	35	2	1	1	2	1	1	2	2	2	0	0	1	1	0	0	0	0	0	0	0	1							0	0	0	0	0	1	0	0	1	1	0	0
513	10	2	57	4	1	1	2	2	1	2	2	2	0	0	0	0	0	1	0	0	0	0	0	1													0	0	0	0	0	1
514	8	2	34	2	2	2	2	2	2	2	2	2
515	8	2	35	2	2	2	2	2	2	2	2	2
516	11	2	64	5	2	1	2	2	2	1	2	2							0	0	0	0	1	0																			0	0	0	0	1	0
517	10	2	52	4	2	2	2	2	2	2	2	2
518	5	1	66	5	2	2	2	2	2	2	2	2
519	4	1	55	4	2	2	2	2	2	2	2	2
520	2	1	34	2	2	2	2	2	2	2	2	2
521	6	1	72	6	2	2	2	2	2	2	2	2																									0	0	1	0	0	0
522	5	1	63	5	2	2	2	2	2	2	2	2	1	1	0	0	0	0	1	1	0	0	0	0													1	1	0	0	0	0
523	5	1	65	5	2	2	2	2	1	1	1	2																									1	0	0	0	0	0	0	0	0	0	1	0	0
524	12	2	73	6	2	2	2	2	1	2	2	2																			0	0	0	0	0	1	1	1	1	1	1	0	0	0	0	0	0	1	0
525	1	1	29	1	2	2	2	2	2	2	2	2
526	12	2	76	6	2	2	2	2	2	2	2	2
527	7	2	25	1	2	1	2	2	2	2	2	2							0	0	0	0	1	0
528	1	1	21	1	2	2	2	2	2	2	2	2
529	4	1	56	4	2	2	2	1	2	2	1	2																			0	0	0	1	0	0													0
530	11	2	63	5	2	2	2	2	2	2	2	2
531	11	2	60	5	2	2	2	2	2	2	2	2							0	0	0	0	0	1																									0
532	1	1	24	1	2	2	2	2	2	2	2	2
533	9	2	46	3	2	2	2	2	1	2	2	2																									0	0	0	0	0	1
534	9	2	43	3	2	2	2	2	2	2	2	2
535	1	1	27	1	2	2	2	2	2	2	2	2
536	6	1	71	6	2	2	2	2	2	2	2	2
537	9	2	45	3	2	2	2	2	1	2	2	2																									0	0	0	0	0	1
538	1	1	26	1	2	2	2	2	2	2	2	2
539	10	2	56	4	2	2	2	2	2	2	2	2	0	0	0	0	0	1	0	0	0	0	0	1	1	1	0	0	0	0
540	4	1	56	4	2	2	2	2	2	2	2	2																			0	0	0	0	0	1	0	0	0	0	0	1							0
541	12	2	77	6	2	2	2	2	2	2	1	1																																					1
542	1	1	24	1	2	2	2	2	2	2	2	2
543	11	2	67	5	2	1	2	2	1	2	2	2							0	0	0	0	1	0													0	0	0	0	1	0
544	11	2	67	5	2	2	2	2	2	2	2	2
545	9	2	48	3	2	1	2	2	1	2	2	2							0	0	0	0	1	0													1	0	0	0	0	0
546	9	2	41	3	2	2	2	2	2	2	2	2	0	0	0	0	1	0	0	0	0	0	1	0													0	0	0	0	1	0							0
547	6	1	70	6	1	2	2	2	2	2	1	2	0	0	0	0	0	1	0	0	0	0	0	1													1	0	0	0	0	0							0
548	7	2	24	1	2	2	2	2	2	2	2	2
549	4	1	51	4	2	2	2	2	2	2	2	2
550	5	1	60	5	2	2	2	2	2	2	2	2
551	5	1	60	5	2	2	2	2	2	2	2	2
552	8	2	39	2	2	2	2	2	2	2	2	2							0	0	0	0	0	1													0	0	0	0	0	1
553	12	2	71	6	2	2	2	2	2	2	2	2	0	0	0	0	0	1
554	7	2	27	1	2	2	2	2	2	2	2	2
555	3	1	42	3	2	2	2	2	2	2	2	2
556	10	2	50	4	2	2	2	2	2	2	2	2							0	0	0	0	0	1
557	2	1	39	2	2	2	2	2	2	2	2	2
558	1	1	27	1	2	2	2	2	2	2	2	2
559	4	1	52	4	2	2	2	2	2	2	2	2
560	7	2	21	1	2	2	2	2	2	2	2	2
561	5	1	63	5	2	2	2	2	2	2	2	2
562	4	1	59	4	2	2	2	2	2	2	2	2																			0	0	0	0	1	0
563	4	1	56	4	2	2	2	2	2	2	2	2																									0	0	0	0	0	1
564	10	2	54	4	2	2	2	2	2	2	2	2
565	11	2	62	5	2	2	2	2	1	1	2	1																									0	0	1	0	0	0	1	0	1	0	0	0
566	10	2	57	4	2	2	2	2	2	2	2	2							0	0	0	0	1	0													0	0	0	0	1	0
567	12	2	76	6	2	2	2	2	2	2	1	2																																					1
568	11	2	63	5	2	2	2	2	1	2	2	2																									0	0	0	0	1	0
569	2	1	30	2	2	2	2	2	2	2	2	2
570	8	2	39	2	2	2	2	2	2	2	2	2	1	0	1	1	0	0																			0	0	0	0	1	0
571	6	1	70	6	2	2	2	2	2	2	2	2							1	0	0	0	0	0
572	11	2	62	5	2	2	2	2	2	2	2	2
573	8	2	33	2	2	2	2	2	2	2	2	2
574	5	1	63	5	2	2	2	2	2	2	2	2
575	10	2	51	4	2	2	2	2	2	2	2	2	0	0	0	0	1	0	0	0	0	0	1	0
576	11	2	61	5	2	2	2	2	1	2	2	1																									1	0	0	0	0	0
577	3	1	48	3	2	2	2	2	2	2	2	2							0	0	0	0	1	0							0	0	0	0	1	0	0	0	0	0	1	0
578	10	2	52	4	2	2	2	2	2	2	2	2
579	8	2	31	2	2	2	2	2	2	2	2	2	0	0	0	0	0	1	0	0	0	0	0	1
580	11	2	66	5	2	2	2	2	2	2	2	2
581	3	1	48	3	1	2	2	2	1	2	2	2	0	0	0	1	0	0																			0	0	1	1	0	0
582	8	2	36	2	2	2	2	2	2	2	1	2																																					0
583	1	1	28	1	2	2	2	2	2	2	2	2
584	3	1	47	3	2	2	2	2	2	2	2	2
585	6	1	76	6	1	1	2	2	1	2	2	2	0	0	1	1	1	0	0	0	1	1	1	0													1	0	1	1	1	0
586	11	2	61	5	2	2	2	2	2	2	2	1
587	12	2	73	6	2	2	2	2	2	2	2	2																									0	0	1	0	1	0							1
588	5	1	63	5	2	2	2	2	2	2	2	2	0	0	0	0	0	1							0	0	0	0	0	1							1	1	1	0	0	0	1	1	0	0	0	0
589	4	1	55	4	2	2	1	2	1	2	2	2													1	0	0	0	0	0							1	1	1	0	0	0
590	11	2	65	5	2	2	2	2	2	2	2	2
591	2	1	34	2	2	2	2	2	2	2	1	2																																					1
592	2	1	36	2	2	2	2	2	2	2	2	2																																					1
593	3	1	46	3	2	2	2	2	1	2	2	2																									0	0	0	0	1	0							0
594	9	2	40	3	1	1	2	2	2	2	2	2	0	0	0	0	1	0	0	0	0	0	1	0
595	9	2	42	3	2	2	2	2	2	2	2	2
596	10	2	57	4	1	1	2	1	1	2	2	2	0	0	1	0	1	0	0	0	1	0	1	0							0	0	0	0	0	1	0	0	1	0	1	0							0
597	8	2	39	2	2	2	2	2	2	2	2	2
598	6	1	73	6	2	2	2	2	1	2	2	2																									1	0	0	0	0	0
599	10	2	59	4	2	2	2	2	1	1	1	2	0	0	0	0	0	1	0	0	0	0	0	1													1	1	0	0	0	0	1	1	0	0	0	0	1
600	10	2	52	4	2	2	2	2	2	2	2	2
601	9	2	41	3	2	2	2	2	2	2	2	2							0	0	0	0	0	1
602	7	2	29	1	2	2	2	2	2	2	1	2																																					1
603	12	2	71	6	2	2	2	2	2	2	2	2
604	1	1	28	1	2	2	2	2	2	2	2	2
605	11	2	69	5	2	2	2	2	2	2	2	2	0	0	0	0	0	1	0	0	0	0	1	0													0	0	0	0	1	0							0
606	9	2	40	3	2	2	2	2	2	2	2	2
607	2	1	31	2	2	2	2	2	2	2	2	2
608	11	2	63	5	2	2	2	2	2	1	2	2																									1	0	0	0	0	0	0	0	0	0	0	1
609	8	2	33	2	2	1	2	1	1	2	2	2							0	0	0	1	0	0							0	0	0	1	0	0	0	0	0	1	0	0
610	12	2	74	6	2	2	2	2	2	2	2	2																									1	0	0	0	0	0	1	1	0	0	0	0
611	8	2	36	2	1	1	2	1	1	2	2	2	0	0	1	1	0	0	0	0	1	1	1	0							0	0	1	0	0	0	0	0	1	1	1	0	0	0	1	1	0	0
612	9	2	45	3	2	2	2	2	2	2	2	2
613	7	2	24	1	1	1	2	2	2	2	2	2	0	0	0	0	0	1	0	0	0	0	0	1
614	10	2	59	4	1	1	2	1	1	2	2	1	0	0	0	0	1	0	0	0	0	0	1	0							0	0	0	0	1	0	0	0	0	0	1	0
615	7	2	26	1	2	2	2	2	2	2	2	2
616	11	2	68	5	2	2	2	2	2	2	2	2
617	8	2	31	2	2	2	2	2	2	2	2	2	0	0	0	0	0	1	0	0	0	0	0	1	0	0	0	0	0	1	0	0	0	0	0	1	0	0	0	0	0	1	0	0	0	0	0	1
618	12	2	72	6	2	2	2	2	2	2	1	1	1	1	0	1	1	0	1	1	1	1	1	0							1	1	0	0	0	0	1	1	1	1	1	0							1
619	6	1	77	6	2	2	2	2	1	2	2	2																									1	0	0	0	1	0
620	10	2	51	4	2	2	2	2	2	2	2	2
621	5	1	65	5	2	1	2	2	2	1	2	2							1	1	0	0	0	0	1	0	0	0	0	0							1	0	0	0	0	0	1	0	0	0	0	0
622	8	2	32	2	1	1	2	2	1	2	2	2	0	0	0	1	1	0	0	0	0	1	1	0													0	0	0	1	1	0
623	1	1	20	1	1	2	1	2	2	2	2	1	1	0	0	0	0	0							0	0	0	0	0	0	0	0	1	0	0	0							0	0	0	1	0	0
624	9	2	40	3	2	2	2	2	2	2	2	2
625	11	2	61	5	2	2	2	2	2	2	2	2
626	8	2	31	2	2	2	2	2	2	2	2	2
627	8	2	33	2	2	1	2	2	2	2	2	2							0	0	0	0	1	0
628	4	1	56	4	2	2	2	2	1	2	2	2																									1	0	0	0	1	0
629	11	2	65	5	2	2	2	2	2	2	2	2
630	8	2	33	2	2	2	2	2	2	2	2	2
631	7	2	25	1	2	2	2	2	2	2	2	2
632	4	1	54	4	2	2	2	2	2	2	2	2																									0	0	0	0	0	1
633	12	2	76	6	2	2	2	2	2	2	2	2
634	1	1	22	1	2	2	2	2	1	2	2	2																									0	0	0	0	0	1
635	5	1	67	5	2	2	2	2	2	2	2	2
636	6	1	75	6	2	2	2	2	1	2	2	2	0	0	0	0	1	0																			0	0	0	0	0	1
637	1	1	26	1	2	2	2	2	2	2	2	2
638	9	2	48	3	2	2	2	2	2	2	2	1
639	2	1	36	2	2	2	2	2	2	2	2	2
640	8	2	37	2	2	2	2	2	2	2	2	2
641	7	2	25	1	2	1	2	2	2	2	2	2							0	0	0	0	1	0
642	5	1	63	5	2	2	2	2	2	2	2	2
643	7	2	27	1	2	2	2	2	2	2	2	2
644	5	1	63	5	2	2	2	2	2	2	2	2																									1	0	0	0	0	0
645	12	2	75	6	2	2	2	2	2	2	2	2
646	11	2	67	5	2	2	2	2	2	2	2	2
647	12	2	72	6	2	2	2	2	2	2	2	2
648	12	2	73	6	2	1	2	2	1	1	1	2							1	0	0	0	0	0													0	0	0	0	1	0	1	0	0	0	0	0	1
649	4	1	57	4	2	2	2	2	2	2	2	2
650	5	1	63	5	2	2	2	2	2	2	2	2
651	4	1	54	4	2	2	2	2	2	2	2	2	0	0	0	0	1	0	0	0	0	0	1	0
652	5	1	60	5	2	2	2	2	2	2	2	2
653	6	1	72	6	2	2	2	2	2	2	2	2																									0	0	0	0	0	0
654	8	2	39	2	2	2	2	2	2	2	2	2							0	0	0	0	0	1
655	5	1	61	5	2	2	2	2	2	2	2	2
656	5	1	67	5	1	1	2	2	1	2	2	2	0	0	0	1	0	0	0	0	0	1	0	0													0	0	0	1	0	0							1
657	10	2	50	4	2	2	2	2	2	2	2	2	0	0	0	0	0	1	0	0	0	0	0	1													0	0	0	0	0	1							0
658	9	2	49	3	2	2	2	2	1	2	2	2																									0	0	0	0	1	0
659	11	2	64	5	1	1	2	1	2	2	1	2	0	0	0	0	0	1	0	0	0	0	0	1							0	0	0	0	0	1													0
660	12	2	74	6	2	2	2	2	2	2	1	2																																					0
661	6	1	71	6	2	2	2	2	2	2	2	2
662	10	2	55	4	2	2	2	2	2	2	2	2
663	2	1	30	2	2	1	1	1	1	2	1	2							0	0	0	1	1	0	1	0	0	1	0	0	0	0	0	1	1	0	0	0	0	1	1	0							0
664	6	1	73	6	2	2	2	2	1	2	2	2																									0	0	0	0	1	0
665	10	2	54	4	1	1	2	2	1	1	2	2	0	0	0	0	0	1	0	0	0	0	0	1													0	0	0	0	0	0	0	0	0	0	0	1
666	3	1	49	3	2	2	2	2	2	2	2	2
667	10	2	58	4	1	1	1	1	1	2	1	1	0	0	1	0	1	0	0	0	1	0	1	0	0	0	1	0	1	0	0	0	1	0	0	0	0	0	1	0	1	0	0	0	1	0	0	0	0
668	2	1	38	2	2	2	2	2	2	2	2	2
669	8	2	32	2	2	2	2	2	2	2	2	2							0	0	0	0	0	1													0	0	0	0	0	1
670	7	2	27	1	2	2	2	2	2	2	2	2																									1	0	1	0	0	0
671	11	2	60	5	2	2	2	2	1	2	2	2																									0	0	0	0	0	1
672	3	1	43	3	2	2	2	2	2	2	2	2
673	12	2	74	6	2	2	2	2	2	2	2	2																									0	0	0	0	0	1	0	0	0	0	0	1	0
674	12	2	74	6	2	2	2	2	2	2	2	2
675	12	2	75	6	2	2	2	2	1	2	2	2																									0	0	0	0	1	0
676	11	2	62	5	2	2	2	2	2	2	2	2																			0	0	0	0	0	1							0	0	0	0	0	1
677	9	2	44	3	2	2	2	2	1	2	2	2	0	0	0	0	1	0																			0	0	0	0	0	1
678	4	1	59	4	2	2	2	2	2	2	2	2																																					0
679	7	2	25	1	2	2	2	2	2	2	2	2
680	2	1	34	2	2	2	2	2	2	2	2	2
681	9	2	44	3	2	2	2	2	1	2	2	2																									0	0	1	0	0	0
682	5	1	60	5	2	2	2	2	2	2	2	2	0	0	0	0	0	1	0	0	0	0	0	1													0	0	0	0	0	1
683	5	1	64	5	1	1	2	2	1	2	2	1	0	0	0	1	1	0	0	0	0	1	1	0													0	0	0	1	1	0
684	4	1	56	4	2	2	2	2	2	2	2	2
685	5	1	62	5	2	1	2	2	2	2	2	2							1	1	0	0	0	0	0	0	1	1	1	0
686	7	2	27	1	2	2	2	2	2	2	2	2
687	1	1	29	1	2	2	2	2	2	2	2	2
688	5	1	65	5	2	2	2	2	2	2	2	2
689	11	2	69	5	2	2	2	2	2	2	2	2
690	12	2	72	6	2	2	1	1	1	1	1	1													0	0	0	0	1	0	1	0	0	0	1	0	1	0	0	0	1	0	0	0	0	0	1	0	1
691	11	2	67	5	2	2	2	2	2	2	2	2
692	12	2	76	6	2	2	2	2	1	1	2	2	1	0	0	0	0	0																			1	1	0	0	0	0	0	0	0	0	0	1
693	4	1	58	4	2	2	2	2	2	2	2	2	0	0	0	1	0	0	0	0	0	1	0	0
694	5	1	68	5	2	2	2	2	2	2	2	2
695	10	2	59	4	2	2	2	2	2	2	2	2																			1	0	0	0	0	0
696	3	1	46	3	2	2	2	2	2	2	2	2
697	9	2	49	3	2	2	2	2	2	2	1	2	0	0	0	0	0	1	0	0	0	0	1	0													0	0	0	0	0	1							0
698	9	2	48	3	2	2	2	2	2	2	2	2	1	0	0	0	1	0	1	0	0	0	1	0													1	0	0	0	1	0
699	4	1	52	4	2	2	2	2	2	2	2	2
700	4	1	53	4	1	1	2	2	2	2	2	2	0	0	0	0	0	1	0	0	0	0	0	1
701	12	2	72	6	1	2	2	2	2	2	2	2	0	0	0	0	0	1
702	7	2	29	1	2	2	2	2	2	2	2	2	0	0	0	1	0	0	0	0	0	1	0	0																									0
703	4	1	51	4	2	2	2	2	2	2	2	2
704	5	1	67	5	2	2	2	2	2	2	2	2
705	11	2	60	5	1	1	2	2	1	2	2	2	1	0	1	0	1	0	1	0	0	0	1	0	0	0	0	0	0	1	1	0	0	0	1	0	1	1	1	0	0	0	0	0	0	0	0	1	0
706	1	1	28	1	2	2	2	2	2	2	2	2
707	8	2	34	2	2	2	2	2	2	2	2	1
708	1	1	22	1	2	2	2	2	2	2	2	2
709	1	1	23	1	2	2	2	2	2	2	2	2	0	0	0	0	0	1	0	0	0	0	0	1	0	0	0	0	0	1	0	0	0	0	0	1	0	0	0	0	0	1	0	0	0	0	0	1	0
710	11	2	61	5	2	1	2	2	1	2	2	2							0	0	0	0	1	0													0	0	0	0	1	0
711	9	2	48	3	2	2	2	2	2	2	2	2
712	6	1	74	6	2	2	2	2	2	2	2	2
713	4	1	55	4	2	2	2	2	2	2	2	2
714	3	1	47	3	2	2	2	2	2	2	2	2
715	11	2	60	5	2	2	2	2	2	2	2	2							0	0	0	0	0	1
716	6	1	78	6	2	2	2	2	2	1	2	2																															0	0	0	0	1	0
717	3	1	48	3	2	2	2	2	2	2	2	2
718	10	2	54	4	2	2	2	2	2	2	2	2
719	4	1	56	4	2	2	2	2	2	2	1	2							1	1	0	0	1	0																									1
720	11	2	61	5	2	2	2	2	2	2	2	2
721	12	2	74	6	2	2	2	2	2	2	2	2
722	2	1	34	2	2	2	2	2	2	2	2	2
723	7	2	25	1	2	2	2	2	2	2	2	2
724	6	1	71	6	2	2	2	2	2	2	2	2
725	9	2	43	3	2	2	2	2	2	2	2	2
726	5	1	67	5	2	1	2	2	2	2	1	2							1	1	0	0	0	0													1	1	0	0	0	0							1
727	6	1	73	6	2	2	2	2	2	2	2	2							0	0	0	0	1	0													1	0	1	0	0	0							0
728	3	1	40	3	2	2	2	2	1	2	2	2																									1	0	0	0	0	0
729	1	1	27	1	2	1	2	2	1	2	1	2							0	0	0	0	0	0													1	0	0	0	1	0							0
730	3	1	47	3	2	2	2	2	2	2	2	2							0	0	0	0	0	1
731	12	2	74	6	2	2	2	2	2	2	2	2							0	0	0	1	0	0
732	7	2	25	1	2	2	2	2	2	2	2	2
733	5	1	63	5	2	2	2	2	2	2	2	2
734	5	1	64	5	2	2	2	2	2	2	2	2	0	0	0	0	0	1	0	0	0	0	0	1
735	11	2	68	5	1	1	2	2	2	2	2	2	0	0	0	1	0	0	1	1	0	0	0	0													0	0	1	0	0	0							1
736	9	2	49	3	2	2	2	2	2	2	2	2	0	0	0	0	1	0	0	0	0	0	1	0	0	0	0	0	1	0	0	0	0	0	1	0	0	0	0	0	1	0	0	0	0	0	0	1	0
737	8	2	34	2	2	2	2	2	2	2	2	2	0	0	0	0	0	1	0	0	0	0	0	1							0	0	0	0	0	1							0	0	0	0	0	1	0
738	6	1	73	6	2	2	2	2	2	2	2	2
739	8	2	36	2	1	1	2	2	2	2	2	2	0	0	1	0	0	0	0	0	1	0	0	0
740	11	2	61	5	1	1	2	2	1	1	2	2	0	0	0	0	1	0	0	0	0	0	1	0													0	0	0	0	1	0	0	0	0	0	0	1
741	10	2	58	4	2	2	2	2	2	2	2	2
742	8	2	39	2	2	2	2	2	2	2	2	2
743	7	2	23	1	2	2	2	2	2	2	2	2
744	11	2	61	5	2	2	2	2	2	2	2	2
745	11	2	61	5	2	2	2	2	2	2	2	2
746	3	1	49	3	2	2	2	2	2	2	2	2
747	4	1	58	4	2	2	2	2	1	2	2	2	0	0	0	0	1	0	0	0	0	0	1	0													0	0	0	0	0	0							0
748	4	1	51	4	2	2	2	2	2	2	2	2
749	10	2	56	4	2	2	2	2	2	2	2	2																									0	0	0	0	0	1							0
750	7	2	29	1	2	2	2	2	2	2	2	2
751	9	2	49	3	2	2	2	1	1	2	2	2																			1	0	0	0	0	0	1	0	0	0	0	0
752	12	2	73	6	2	2	2	2	2	2	2	1
753	9	2	48	3	2	2	2	2	2	2	2	2																			1	0	0	0	0	0													1
754	7	2	22	1	2	2	2	2	2	2	2	2
755	10	2	59	4	2	2	2	2	1	2	2	2																									1	0	0	0	0	0
756	9	2	48	3	1	1	2	2	1	2	1	2	0	0	0	0	1	0	0	0	0	0	1	0													0	0	0	0	1	0							1
757	4	1	51	4	2	2	2	2	2	2	2	2
758	5	1	63	5	2	1	2	2	2	2	2	2							0	0	0	0	1	0
759	7	2	22	1	2	2	2	2	2	2	2	2
760	12	2	70	6	2	2	2	2	2	2	2	2	0	0	0	0	1	0	0	0	0	0	1	0	0	0	0	0	1	0	0	0	0	0	1	0	1	0	0	0	0	0	0	0	0	0	0	1	1
761	2	1	37	2	2	2	2	2	2	2	2	2
762	5	1	68	5	2	2	2	2	2	2	2	2	0	0	0	0	0	1	0	0	0	0	1	0							0	0	0	0	0	1	0	0	1	0	0	0
763	9	2	46	3	2	2	2	2	1	2	2	1	0	0	0	0	0	1																			0	0	0	0	1	0
764	9	2	42	3	2	2	2	2	2	2	2	2
765	11	2	64	5	1	1	2	2	2	2	2	2	0	0	1	0	0	0	0	0	1	0	1	0
766	3	1	45	3	2	2	2	2	2	2	2	2
767	10	2	53	4	2	2	2	2	2	2	2	2
768	7	2	28	1	1	2	2	2	2	2	2	2	0	0	0	0	1	0
769	7	2	29	1	2	2	2	2	2	2	2	2	0	0	0	0	0	1	0	0	0	0	0	1													0	0	0	0	0	1
770	11	2	62	5	2	2	2	2	1	2	2	2	1	1	1	1	0	0	0	0	0	1	0	0							0	0	0	0	0	1	1	1	1	1	0	0							1
771	8	2	34	2	2	2	2	2	2	2	2	2	0	0	0	0	0	1
772	7	2	29	1	2	2	2	2	2	2	2	2
773	5	1	60	5	2	2	2	2	2	2	2	2	0	0	0	0	1	0	0	0	0	0	1	0													0	0	0	0	1	0
774	12	2	74	6	2	2	2	2	2	2	2	2
775	4	1	58	4	2	2	2	2	2	2	2	2
776	5	1	67	5	2	2	2	2	2	2	2	2
777	3	1	48	3	2	2	2	2	2	2	2	2
778	10	2	53	4	2	2	2	2	2	2	2	2	0	0	0	0	1	0	0	0	0	0	1	0													1	0	1	0	0	0
779	9	2	44	3	2	2	2	2	2	2	2	2
780	1	1	29	1	2	2	2	2	2	2	2	2
781	7	2	25	1	2	2	2	2	2	2	2	2
782	9	2	47	3	2	2	2	2	2	2	2	2
783	11	2	68	5	2	2	2	2	2	2	2	2																									1	0	0	0	0	0
784	10	2	59	4	2	2	2	2	2	2	2	2
785	3	1	47	3	2	2	2	2	2	2	2	2	1	1	0	1	1	0	1	1	0	1	1	0							1	1	0	1	1	0	1	1	0	1	1	0	1	1	0	1	1	0	1
786	7	2	22	1	1	1	2	2	2	2	2	2	0	0	0	0	0	1	0	0	0	0	0	1
787	10	2	54	4	2	2	2	2	2	2	2	2
788	5	1	68	5	1	1	1	1	1	1	1	1	0	0	0	1	1	0	0	0	0	1	1	0	0	0	0	1	1	0	1	0	0	1	1	0	1	0	0	1	1	0	1	0	0	1	1	0	0
789	7	2	29	1	1	2	2	2	2	2	2	2	1	0	0	0	0	0
790	5	1	68	5	2	2	2	2	2	2	2	2							1	0	0	0	0	0	1	0	0	0	0	0	1	0	0	0	0	0							1	0	0	0	0	0	1
791	11	2	63	5	2	2	2	2	2	2	2	2																			0	0	0	0	0	1	0	0	0	0	0	1	0	0	0	0	0	1	0
792	12	2	73	6	2	2	2	2	2	2	2	2
793	2	1	37	2	2	2	2	2	2	2	2	2	0	0	0	0	0	1	0	0	0	0	0	1													0	0	0	0	0	1
794	8	2	38	2	1	1	2	2	2	2	2	2	0	0	0	0	1	0	0	0	0	0	1	0
795	2	1	37	2	2	2	2	2	2	2	2	2
796	4	1	50	4	2	2	2	2	2	2	2	2
797	2	1	35	2	2	2	2	2	2	2	2	2
798	2	1	36	2	2	2	2	2	1	2	2	2																									0	0	0	0	0	1
799	3	1	40	3	2	2	2	2	2	2	2	2
800	9	2	48	3	2	2	2	2	2	2	2	2	1	1	0	0	1	0													1	0	0	0	1	0
801	3	1	46	3	2	2	2	2	1	2	2	2																									1	0	0	0	0	0
802	4	1	59	4	2	2	2	2	2	2	2	2							1	0	0	0	0	0							1	0	0	0	0	0	1	0	0	0	0	0
803	11	2	62	5	2	2	2	2	2	2	2	2	0	0	0	0	0	0													0	0	0	0	0	0	0	0	0	0	0	0							0
804	6	1	77	6	2	2	2	2	2	2	2	2
805	3	1	43	3	2	2	2	2	2	2	2	2																															0	0	0	0	0	1	0
806	6	1	71	6	2	2	2	2	2	2	2	2
807	11	2	64	5	2	1	2	2	2	1	2	2							0	0	0	0	1	0																			0	0	0	0	1	0
808	12	2	72	6	2	2	2	2	2	2	2	2	1	0	0	0	0	0	1	0	0	0	0	0													1	0	0	0	0	0							1
809	9	2	46	3	1	1	1	1	2	1	1	1	0	0	0	0	1	0	0	0	0	0	1	0	0	0	0	0	1	0	0	0	0	0	1	0	1	0	0	0	0	0	1	0	0	0	0	0	0
810	7	2	27	1	2	2	2	2	2	2	2	2
811	7	2	22	1	2	1	1	2	2	2	2	2							0	0	0	0	1	0	0	0	0	0	1	0
812	1	1	25	1	2	2	2	2	2	2	2	2	0	0	0	0	1	0	0	0	0	0	1	0													0	0	0	0	1	0
813	6	1	73	6	2	2	2	2	2	2	2	2																									1	0	0	0	0	0
814	12	2	73	6	2	2	2	2	2	2	2	2	1	0	0	0	0	0	1	0	0	0	0	0													1	0	0	0	0	0	1	0	0	0	0	0
815	11	2	62	5	2	2	2	2	2	2	1	2																									1	0	0	0	0	0							0
816	8	2	35	2	2	2	2	2	1	2	2	2																									0	0	0	1	0	0
817	4	1	58	4	2	1	2	2	2	2	2	2	0	0	1	1	1	0	1	1	1	1	1	0
818	10	2	57	4	1	1	2	2	2	2	1	2	0	0	0	0	1	0	0	0	0	0	1	0																									1
819	6	1	72	6	2	2	2	2	2	2	2	2	1	1	0	0	0	0	1	1	1	0	0	0
820	10	2	52	4	2	2	2	2	2	2	2	2
821	8	2	34	2	2	1	2	2	1	2	2	2							0	0	0	1	0	0													0	0	0	0	1	0
822	8	2	35	2	2	1	2	1	1	2	2	2							0	0	0	0	0	1							0	0	0	0	1	0	0	0	0	0	1	0
823	12	2	71	6	2	2	2	2	2	2	2	2
824	3	1	43	3	2	2	2	2	2	2	2	2
825	5	1	65	5	1	2	2	2	1	2	1	2	0	0	0	0	1	0																			0	0	0	0	1	0							0
826	10	2	52	4	2	2	2	2	1	2	2	2																									0	0	1	0	1	0
827	2	1	35	2	2	2	2	2	2	2	2	2
828	11	2	69	5	1	1	2	2	2	2	2	2	1	0	0	0	0	0	1	0	0	0	0	0							1	0	0	0	0	0	1	0	0	0	0	0	1	0	0	0	0	0
829	4	1	57	4	2	2	2	2	2	2	2	2
830	12	2	72	6	2	2	2	2	2	2	1	2																																					1
831	11	2	62	5	2	2	2	2	2	2	2	2
832	9	2	41	3	2	1	2	2	1	2	2	2							0	0	0	0	1	0													0	0	0	1	0	0
833	3	1	47	3	2	2	2	2	2	2	2	2
834	5	1	65	5	2	2	2	2	2	2	2	2	1	0	0	0	0	0	0	0	0	0	1	0							1	0	0	0	0	0	1	0	0	0	0	0							1
835	6	1	72	6	2	2	2	2	2	2	2	2
836	9	2	47	3	2	2	2	1	2	2	2	2	1	1	0	0	0	0	0	0	0	1	1	0							1	0	0	0	0	0	1	1	0	0	0	0
837	6	1	78	6	2	2	2	2	2	2	2	2																									1	0	0	0	0	0							1
838	10	2	56	4	1	1	1	2	1	2	2	2	0	0	1	1	1	0	0	0	1	1	1	0	0	0	1	1	1	0							0	0	1	1	1	0
839	10	2	50	4	2	2	2	2	2	2	2	2
840	10	2	50	4	1	2	2	2	1	2	2	2	1	0	0	0	1	0							1	0	1	0	1	0							1	0	1	0	1	0
841	2	1	39	2	2	1	2	2	1	2	2	2	1	0	0	1	0	0	0	0	1	0	1	0													0	0	0	1	0	0
842	1	1	21	1	2	2	2	2	2	2	2	2
843	1	1	28	1	2	2	2	2	2	2	2	2
844	9	2	47	3	1	1	2	2	1	2	2	2	0	0	0	0	0	1	0	0	0	0	0	1													0	0	0	0	0	1
845	7	2	23	1	2	2	2	2	2	2	2	2																			0	0	1	0	0	0
846	11	2	62	5	1	1	2	2	2	2	2	2	0	0	0	0	0	1	0	0	0	0	1	0
847	9	2	44	3	2	1	2	2	1	2	2	2							0	0	0	1	0	0													0	0	0	1	0	0
848	7	2	27	1	2	2	2	2	2	2	2	2
849	7	2	26	1	2	2	2	2	2	2	2	2
850	10	2	58	4	2	2	2	2	2	2	2	2
851	11	2	65	5	2	2	2	2	2	2	2	2
852	10	2	53	4	2	2	2	2	2	2	2	2	0	0	0	0	1	0	0	0	0	0	1	0
853	2	1	30	2	1	1	2	2	2	2	2	2	0	0	0	0	1	0	0	0	0	0	1	0
854	11	2	65	5	2	2	2	2	2	2	2	2							1	0	0	0	1	0																			1	1	0	0	1	0	1
855	11	2	61	5	2	2	2	2	2	2	2	2							0	0	0	0	0	1
856	4	1	59	4	2	2	2	2	2	2	2	2
857	10	2	50	4	2	2	2	2	2	2	2	2
858	9	2	44	3	1	1	1	2	1	2	2	2	0	0	1	0	0	0	0	0	1	0	0	0	0	0	1	0	0	0	1	0	0	0	0	0	0	0	1	0	0	0							0
859	9	2	40	3	1	1	2	2	2	2	2	2	0	0	0	1	1	0	0	0	0	1	1	0
860	11	2	63	5	1	1	2	1	1	2	1	1	1	1	0	0	0	0	1	1	0	0	0	0							0	0	0	0	0	1	1	1	0	0	0	0	0	0	0	0	0	1	1
861	1	1	29	1	2	2	2	2	2	2	2	2
862	6	1	73	6	2	2	2	2	2	2	2	2
863	2	1	35	2	2	2	2	2	2	2	2	2
864	2	1	38	2	2	2	2	2	2	2	2	2
865	4	1	57	4	2	2	2	2	2	2	2	2
866	2	1	33	2	2	2	2	2	2	2	2	2
867	2	1	35	2	1	1	2	2	1	2	2	2	0	0	1	0	0	0	0	0	1	0	1	0													0	0	1	0	1	0
868	10	2	53	4	1	2	2	2	1	2	2	2	1	1	1	0	0	0																			1	0	0	0	0	0
869	9	2	43	3	2	2	2	2	2	2	2	2
870	9	2	43	3	1	1	2	1	2	2	2	2	0	0	0	0	1	0	1	1	0	0	1	0							1	0	0	0	1	0
871	3	1	47	3	2	2	2	2	2	2	2	2
872	9	2	44	3	2	2	2	2	2	2	2	2
873	5	1	64	5	2	2	2	2	2	2	2	2																									0	0	0	0	1	0
874	4	1	51	4	2	2	2	1	2	2	2	2																			1	0	0	0	1	0
875	5	1	60	5	2	2	2	2	2	1	2	2							0	0	1	0	0	0							0	0	0	0	1	0	0	0	0	0	1	0	0	0	1	0	0	0
876	8	2	34	2	2	2	2	2	1	2	1	2																									0	0	0	0	0	1							0
877	10	2	54	4	2	2	2	2	2	2	2	2
878	8	2	37	2	1	1	2	1	2	2	2	2	1	0	0	0	0	0	1	0	0	0	0	0							0	0	0	0	0	1
879	9	2	48	3	1	1	2	2	1	1	1	1	0	0	1	1	0	0	0	0	1	1	0	0													0	0	1	1	0	0	0	0	1	1	0	0	0
880	8	2	37	2	2	2	2	2	2	2	2	2
881	8	2	35	2	1	1	2	1	1	2	1	1	0	0	0	0	0	1	0	0	0	0	0	1							0	0	0	0	0	1	0	0	0	0	0	1							0
882	2	1	35	2	2	2	2	2	2	2	2	2
883	10	2	51	4	1	1	2	2	2	2	2	2	0	0	0	0	0	1	0	0	0	1	1	0													1	1	0	0	0	0
884	8	2	32	2	2	2	2	2	2	2	2	2							0	0	0	0	0	1
885	8	2	39	2	2	2	2	2	2	2	2	2							1	0	0	0	0	0	1	0	0	0	0	0	1	0	0	0	0	0	1	0	0	0	0	0	1	0	0	0	0	0	1
886	2	1	35	2	2	2	2	2	2	2	2	2
887	8	2	35	2	2	2	2	2	2	2	2	2
888	3	1	43	3	2	2	2	2	2	2	2	2
889	3	1	48	3	2	2	2	2	2	2	2	2
890	4	1	53	4	1	1	2	2	1	1	1	2	1	0	0	0	1	0	0	0	0	0	1	0													1	1	0	0	0	0	1	1	0	0	0	0	1
891	10	2	50	4	2	2	2	2	2	2	2	2	0	0	0	0	0	1	0	0	0	0	0	1							0	0	0	0	0	1	0	0	0	0	0	1	0	0	0	0	0	1
892	11	2	62	5	2	2	2	2	2	2	2	2							0	0	0	0	1	0							0	0	0	0	1	0	1	0	1	0	1	0	0	0	0	0	0	1	1
893	8	2	35	2	2	2	2	2	2	2	2	2
894	5	1	66	5	2	2	2	2	2	2	2	2
895	7	2	28	1	2	2	2	2	2	2	2	2
896	6	1	71	6	1	1	2	2	2	2	2	2	0	0	1	0	0	0	0	0	1	0	0	0
897	5	1	63	5	1	1	1	2	1	2	1	2	1	0	0	0	0	0	1	0	0	0	0	0	1	0	0	0	0	0							1	0	0	0	0	0							1
898	9	2	46	3	2	2	2	2	2	2	2	2
899	1	1	28	1	2	2	2	2	2	2	2	2
900	12	2	74	6	2	2	2	2	2	2	2	2																																					1
901	2	1	32	2	2	2	2	2	2	2	2	2
902	6	1	72	6	2	2	2	2	2	2	2	2
903	2	1	37	2	2	2	2	2	2	2	2	2
904	12	2	71	6	2	2	2	2	1	2	2	2	1	0	0	0	1	0	1	0	0	0	1	0													0	0	1	0	0	0
905	1	1	25	1	2	2	2	2	2	2	2	2							0	0	0	0	0	1
906	4	1	57	4	2	2	2	2	2	2	2	2
907	11	2	64	5	1	1	2	2	1	2	1	2	1	1	0	0	0	0	0	0	0	0	1	0													1	1	0	0	0	0							0
908	5	1	65	5	2	2	2	2	2	2	2	2
909	10	2	52	4	2	2	2	2	2	2	2	2
910	3	1	46	3	2	2	2	2	2	2	2	2
911	3	1	46	3	2	2	2	2	2	2	2	2
912	1	1	20	1	2	2	2	2	2	2	2	2
913	2	1	38	2	2	2	2	2	2	2	2	2
914	10	2	54	4	2	2	2	2	2	2	2	2
915	3	1	48	3	2	2	2	2	2	2	2	2																									1	0	0	0	0	0
916	4	1	58	4	2	2	2	2	2	2	2	2
917	5	1	66	5	2	2	2	2	2	2	2	2
918	8	2	36	2	2	2	2	2	2	2	2	2	0	0	1	1	1	0	0	0	1	1	1	0													0	0	1	1	1	0	0	0	1	1	1	0
919	9	2	44	3	1	1	2	2	1	2	2	2	0	0	0	0	1	0	0	0	0	0	1	0													0	0	0	0	1	0
920	11	2	63	5	2	1	2	2	2	1	2	2							1	0	0	0	0	0																			0	0	0	0	0	1
921	6	1	74	6	2	2	2	2	2	2	2	2
922	11	2	61	5	2	2	2	2	2	2	2	2							0	0	0	0	0	1																									0
923	4	1	53	4	1	1	1	1	2	2	2	2	0	0	0	0	0	1	0	0	0	0	0	1	0	0	0	0	0	1	0	0	0	0	0	1
924	12	2	71	6	2	2	2	2	2	2	2	2	1	1	0	0	1	0	1	0	0	1	1	0							1	0	0	0	0	0	1	1	0	1	1	0	1	0	0	0	0	0	1
925	2	1	39	2	2	2	2	2	2	2	2	2																									1	0	1	0	1	0
926	9	2	44	3	2	2	2	2	2	2	2	2
927	5	1	66	5	2	2	2	2	2	2	2	2	0	0	0	0	1	0	0	0	0	0	1	0
928	1	1	29	1	2	2	2	2	2	2	2	2
929	7	2	25	1	2	2	2	2	2	2	2	2
930	1	1	22	1	2	2	2	2	2	2	2	2
931	3	1	47	3	2	2	2	2	2	2	2	2	0	0	0	0	1	0	0	0	0	0	1	0													0	0	0	0	1	0	0	0	0	0	0	1
932	10	2	50	4	2	2	2	2	2	2	2	2
933	12	2	76	6	2	2	2	2	2	2	2	2
934	1	1	21	1	2	1	2	2	1	2	2	2							0	0	0	0	0	1													0	0	0	0	1	0
935	12	2	74	6	2	2	2	2	2	2	2	2
936	7	2	27	1	2	2	2	2	2	2	2	2
937	1	1	29	1	2	2	2	2	2	2	2	2
938	9	2	45	3	1	1	2	2	2	1	2	2	0	0	0	0	1	0	0	0	0	0	1	0																			0	0	0	0	0	1
939	1	1	28	1	2	2	2	2	2	2	2	2
940	12	2	72	6	2	2	2	2	1	2	2	2																									0	0	0	0	0	1
941	4	1	51	4	2	2	2	2	2	2	2	2	0	0	0	0	0	1	0	0	0	0	0	1	0	0	0	0	0	1	0	0	0	0	0	1	0	0	0	0	0	1
942	10	2	53	4	2	2	2	2	2	2	2	2
943	3	1	48	3	2	2	2	2	2	2	2	2
944	1	1	27	1	2	2	2	2	2	2	2	2							0	0	0	0	0	1													0	0	0	0	0	1
945	10	2	50	4	2	2	2	2	2	2	2	2
946	4	1	56	4	1	1	2	2	1	2	2	2	1	0	0	0	0	0	1	0	0	0	0	0													1	0	0	0	0	0
947	1	1	29	1	2	2	2	2	2	2	2	2	0	0	0	0	0	1	0	0	0	0	0	1													0	0	0	0	0	1
948	2	1	33	2	2	2	2	2	1	2	2	2	0	0	0	0	1	0	0	0	0	0	1	0													1	0	0	0	1	0							0
949	9	2	49	3	2	2	2	2	2	2	2	2																									1	1	1	1	1	0
950	11	2	63	5	2	1	2	2	2	2	2	2							1	0	1	0	0	0
951	5	1	65	5	2	2	2	2	2	2	2	2
952	7	2	25	1	1	2	2	2	1	2	2	2	0	0	1	0	0	0																			0	0	1	0	0	0
953	4	1	55	4	2	2	2	2	2	2	2	2
954	10	2	58	4	1	1	2	2	1	2	2	2	1	1	0	0	1	0	1	1	0	0	1	0													1	1	0	0	1	0
955	10	2	55	4	2	2	2	2	2	2	2	2
956	7	2	20	1	2	2	2	2	2	2	2	2
957	8	2	37	2	2	2	2	2	2	2	2	2	0	0	1	1	0	0	0	0	1	1	0	0
958	12	2	71	6	2	2	2	2	2	2	2	2
959	10	2	51	4	2	2	2	2	2	2	2	2	0	0	0	0	0	1	0	0	0	0	0	1													0	0	0	0	0	1							0
960	7	2	22	1	2	2	2	2	2	2	2	2
961	1	1	28	1	2	2	2	2	2	2	2	2
962	8	2	38	2	2	2	2	2	2	2	2	2
963	8	2	36	2	2	2	2	2	2	2	2	2
964	3	1	45	3	2	2	2	2	2	2	2	2
965	12	2	75	6	2	2	2	2	2	2	2	2
966	12	2	70	6	2	2	2	2	2	1	2	2	1	0	0	0	0	0	0	0	0	0	1	0							1	0	0	0	0	0	1	0	0	0	0	0	0	0	0	0	1	0	1
967	3	1	44	3	2	2	1	2	2	2	2	2							0	0	0	0	0	1	1	0	0	1	0	0							0	0	0	0	0	1
968	1	1	29	1	2	2	2	2	2	2	2	2
969	12	2	70	6	2	2	2	2	2	2	2	2
970	8	2	33	2	2	2	2	2	2	2	2	2
971	9	2	45	3	2	2	2	2	1	2	1	2																			0	0	0	0	0	1	0	0	0	0	0	1							0
972	12	2	70	6	2	2	2	2	2	2	2	2																																					0
973	4	1	53	4	2	1	2	2	2	2	2	2							0	0	0	0	0	0													0	0	0	0	0	1
974	11	2	61	5	2	1	2	2	1	2	1	2							0	0	0	0	1	0													0	0	0	0	1	0							0
975	7	2	28	1	2	2	2	2	2	2	2	2
976	12	2	74	6	2	2	2	2	2	2	2	1	1	1	0	1	1	0	1	1	0	1	1	0													1	1	0	1	1	0							1
977	9	2	48	3	2	2	2	2	2	2	2	2	0	0	0	0	1	0	0	0	0	0	1	0
978	9	2	44	3	2	2	2	2	2	2	2	2	0	0	0	0	0	1	0	0	0	0	0	1
979	3	1	46	3	2	2	2	2	2	2	2	2	0	0	0	1	0	0	0	0	0	1	0	0													0	0	0	1	0	0
980	3	1	46	3	2	2	2	2	2	2	2	2
981	12	2	71	6	1	2	2	2	2	2	2	2	0	0	0	0	0	1																															1
982	1	1	28	1	2	2	2	2	2	2	2	2																															0	0	0	0	1	0
983	8	2	39	2	2	2	2	2	1	2	2	2	0	0	0	0	0	1																			0	0	0	0	0	1	1	1	0	0	0	0
984	3	1	49	3	1	1	2	2	1	2	2	2	0	0	0	1	0	0	0	0	0	1	0	0													0	0	0	1	0	0
985	6	1	70	6	2	2	2	2	2	2	2	2	0	0	0	0	0	1																															0
986	8	2	38	2	1	1	2	2	2	2	2	2	1	1	1	1	1	0	1	1	1	1	1	0
987	5	1	64	5	2	2	2	2	2	2	2	2																									1	1	1	0	1	0
988	5	1	65	5	2	2	2	2	2	2	2	2
989	6	1	70	6	2	2	2	2	2	2	2	1	0	0	0	0	0	1	0	0	0	0	0	1	0	0	0	0	0	1							0	0	0	0	0	1							0
990	1	1	29	1	2	2	2	2	2	2	2	2	0	0	0	0	0	1	0	0	0	0	0	1													0	0	0	0	0	1
991	6	1	76	6	2	2	2	2	2	2	2	2	0	0	1	0	0	0	0	0	1	0	0	0							0	0	0	0	1	0	1	1	1	0	1	0							1
992	11	2	64	5	2	2	2	2	2	2	2	2
993	7	2	29	1	2	2	2	2	2	2	2	2
994	4	1	56	4	2	2	2	2	2	2	2	2
995	8	2	37	2	1	1	2	1	1	2	2	2	0	0	0	1	0	0	0	0	0	1	0	0							0	0	0	1	0	0	0	0	0	1	0	0
996	7	2	25	1	2	2	2	2	2	1	2	2																															1	0	0	0	0	0
997	7	2	23	1	2	2	2	2	2	2	2	2
998	5	1	65	5	2	2	2	2	2	2	2	2
999	4	1	54	4	2	2	2	2	2	2	2	2
1000	3	1	43	3	2	2	2	2	2	2	2	2
1001	7	2	25	1	2	2	2	2	2	2	2	2
1002	11	2	60	5	1	1	2	2	1	2	1	2	0	0	0	1	0	0	0	0	0	1	0	0	1	0	0	0	0	0							1	0	0	0	0	0							1
1003	6	1	71	6	2	2	2	2	1	2	2	2																									1	0	0	0	0	0
1004	10	2	55	4	2	2	2	2	2	2	2	2	1	0	0	0	0	0	0	0	0	0	0	1
1005	4	1	51	4	2	2	2	2	2	2	2	2
1006	12	2	79	6	2	2	2	2	2	2	2	2
1007	8	2	30	2	2	2	2	2	2	2	2	2
1008	7	2	27	1	2	2	2	2	2	2	2	2
1009	3	1	48	3	2	2	2	2	2	2	2	2
1010	8	2	30	2	2	1	2	2	1	2	2	2							0	0	1	0	0	0													0	0	1	0	0	0
1011	12	2	71	6	2	2	2	2	2	2	2	2																									1	0	0	0	1	0	1	1	0	0	0	0
1012	2	1	36	2	2	2	2	2	2	2	2	2
1013	9	2	44	3	1	1	1	1	1	1	1	1	0	0	0	1	1	0	0	0	0	1	1	0	0	0	0	1	1	0	0	0	0	1	1	0	0	0	0	1	1	0	0	0	0	1	1	0	0
1014	7	2	27	1	2	2	2	2	2	2	2	2
1015	7	2	23	1	2	2	2	2	2	2	2	2
1016	7	2	29	1	2	2	2	2	2	2	2	2
1017	9	2	46	3	2	2	2	2	2	2	2	2
1018	6	1	71	6	2	2	2	2	2	2	1	2																																					1
1019	6	1	73	6	2	2	2	2	2	2	2	2
1020	1	1	25	1	2	2	2	2	2	2	2	2
1021	11	2	60	5	2	2	2	1	2	2	1	2																			0	0	0	0	0	1													1
1022	8	2	37	2	2	2	2	2	2	2	2	2	0	0	1	1	1	0	0	0	1	1	1	0													1	0	1	1	1	0
1023	3	1	49	3	1	1	2	2	1	2	2	2	0	0	0	0	1	0	0	0	0	0	1	0													0	0	0	0	1	0
1024	3	1	41	3	2	2	2	2	2	2	2	2
1025	5	1	60	5	2	2	2	2	2	2	2	2
1026	7	2	24	1	2	2	2	2	2	2	2	2
1027	12	2	75	6	2	1	2	2	2	2	2	2							0	0	0	0	0	1
1028	2	1	31	2	2	2	2	2	2	2	2	2
1029	7	2	28	1	1	1	2	1	1	2	2	1	0	0	0	0	0	1	0	0	0	0	0	1							0	0	0	0	0	1	0	0	0	0	0	1
1030	8	2	38	2	1	1	2	1	1	2	2	1	1	0	1	1	1	0	1	0	1	1	1	0							1	0	0	0	1	0	1	1	1	1	1	0
1031	8	2	35	2	2	2	2	2	2	2	2	2	0	0	0	0	0	1	0	0	0	0	0	1													0	0	0	0	0	1
1032	7	2	26	1	2	2	2	2	2	2	2	2	0	0	1	0	0	0																			0	0	1	0	0	0	0	0	1	0	0	0
1033	12	2	72	6	2	2	2	2	2	2	2	2	0	0	1	1	1	0	0	0	1	1	1	0
1034	9	2	45	3	2	2	2	2	2	2	2	2
1035	11	2	66	5	2	2	2	2	2	2	2	2	0	0	0	0	1	0
1036	3	1	45	3	1	1	1	2	1	2	1	2	1	1	0	0	0	0	1	1	0	0	0	0	1	1	0	0	0	0							1	1	0	0	0	0	1	1	0	0	0	0	1
1037	1	1	22	1	2	2	2	2	2	2	2	2
1038	1	1	29	1	2	2	2	2	2	2	2	2
1039	11	2	62	5	1	1	2	2	1	2	1	1	0	0	0	1	0	0	0	0	0	1	1	0													0	0	0	1	1	0							0
1040	1	1	28	1	2	2	2	2	2	2	2	2
1041	12	2	70	6	2	2	2	2	2	2	2	2
1042	2	1	38	2	2	2	2	2	2	2	2	2
1043	3	1	45	3	2	2	2	2	2	2	2	2
1044	1	1	24	1	2	2	2	2	1	2	2	2																									0	0	0	0	0	1
1045	3	1	43	3	2	2	2	2	2	2	2	2
1046	3	1	42	3	2	2	2	2	2	2	2	2
1047	3	1	49	3	2	2	2	2	2	2	2	2							0	0	0	0	0	1													0	0	0	0	0	1							0
1048	9	2	42	3	2	2	2	2	2	2	2	2
1049	11	2	66	5	2	2	2	2	2	2	2	2																									1	1	0	0	1	0
1050	7	2	22	1	2	2	2	2	2	2	2	2
1051	9	2	40	3	2	1	2	2	1	1	2	2							0	0	1	0	0	0							0	0	0	0	0	1	1	0	1	0	0	0	0	0	0	0	0	1
1052	10	2	52	4	2	2	2	2	2	2	2	2							0	0	0	0	1	0	1	0	0	0	0	0
1053	11	2	65	5	2	2	2	2	2	1	2	2																															0	0	0	0	0	1
1054	1	1	24	1	1	2	2	2	2	2	2	2	1	0	0	0	0	0
1055	3	1	47	3	2	2	2	2	2	2	2	2
1056	3	1	44	3	2	2	2	2	2	2	2	2							0	0	0	1	0	0													0	0	0	1	0	0
1057	4	1	53	4	1	2	1	1	1	2	1	1	1	0	0	0	0	0	0	0	0	0	0	0	0	0	1	0	0	0	0	0	1	0	0	0	0	0	0	0	0	0	0	0	1	0	0	0	0
1058	1	1	24	1	2	2	2	2	2	2	2	2	0	0	0	0	1	0
1059	6	1	71	6	2	2	2	2	2	2	2	2
1060	7	2	23	1	2	2	2	2	2	2	2	2
1061	5	1	61	5	2	1	2	2	1	2	2	2	0	0	0	1	1	0	0	0	0	1	1	0													1	1	0	1	1	0
1062	5	1	62	5	2	2	2	2	2	2	2	2
1063	3	1	42	3	2	2	2	2	2	2	2	2																									0	0	0	0	0	1
1064	7	2	26	1	2	2	2	2	2	2	2	2																																					1
1065	3	1	47	3	2	2	2	2	2	2	2	2
1066	2	1	39	2	2	2	2	2	2	2	2	2
1067	11	2	63	5	2	2	2	2	2	2	2	2																																					0
1068	2	1	38	2	2	2	2	2	2	2	2	2
1069	12	2	79	6	2	2	2	2	2	2	2	2
1070	9	2	48	3	2	2	2	2	2	2	2	2
1071	11	2	63	5	2	2	2	2	2	2	2	2
1072	2	1	38	2	2	2	2	2	2	2	2	2
1073	11	2	62	5	2	2	2	2	2	2	2	2	0	0	0	0	1	0	0	0	0	0	1	0
1074	7	2	21	1	2	2	2	2	2	2	2	2
1075	1	1	27	1	2	2	2	2	2	2	2	2
1076	10	2	53	4	1	1	2	2	1	2	2	2	1	1	1	0	1	0	1	1	1	0	1	0													1	1	1	0	1	0
1077	12	2	78	6	1	1	2	2	1	2	2	2	1	1	0	1	1	0	1	1	1	1	1	0													1	1	1	1	1	0
1078	12	2	74	6	2	1	2	1	2	2	2	1							0	0	0	0	1	0							0	0	0	0	1	0
1079	8	2	32	2	1	1	2	1	1	2	1	1	0	0	0	0	0	1	0	0	0	0	0	1							0	0	0	0	1	0	0	0	0	0	0	1							0
1080	1	1	29	1	2	2	2	2	2	2	2	2
1081	11	2	61	5	2	2	2	2	2	2	2	2
1082	6	1	76	6	2	1	2	2	1	2	2	2							0	0	0	0	0	1													1	0	0	0	0	0
1083	8	2	36	2	2	2	2	2	1	2	2	2	0	0	0	0	0	1	0	0	0	0	0	1							0	0	0	0	0	1	0	0	0	0	0	1	0	0	0	0	0	1	0
1084	3	1	44	3	2	2	2	2	1	2	2	2																									0	0	0	0	1	0
1085	9	2	47	3	2	2	2	2	2	2	2	2
1086	1	1	25	1	2	2	2	2	2	2	2	2
1087	7	2	25	1	1	1	2	2	2	2	2	2	0	0	0	0	1	0	0	0	0	0	1	0
1088	4	1	50	4	2	1	2	2	2	2	2	2							0	0	1	0	0	0
1089	1	1	24	1	2	2	2	2	2	2	2	2
1090	9	2	43	3	1	1	2	2	2	2	2	2	0	0	0	1	0	0	0	0	0	1	0	0							1	0	0	0	0	0	1	0	0	0	0	0							0
1091	11	2	60	5	2	2	2	2	2	2	2	2																			1	0	0	0	0	0
1092	8	2	38	2	2	2	2	2	2	2	2	2
1093	4	1	56	4	2	2	2	2	1	2	2	2																									0	0	0	0	0	1
1094	1	1	27	1	1	1	1	2	1	1	2	2	1	1	1	1	0	0	1	1	1	1	0	0	1	1	1	1	0	0							1	1	1	1	0	0	0	0	0	0	0	1
1095	11	2	64	5	1	1	2	2	2	2	2	2	0	0	0	0	1	0	0	0	0	0	1	0													0	0	0	0	1	0
1096	5	1	64	5	2	2	2	2	2	2	2	2
1097	3	1	45	3	2	2	2	1	2	2	2	2																			0	0	0	0	1	0	0	0	0	0	1	0							0
1098	5	1	62	5	2	2	2	2	2	2	2	2
1099	10	2	54	4	2	2	2	1	1	2	1	1	0	0	0	0	0	1	0	0	0	0	0	1							1	0	0	0	0	0	1	0	0	0	0	0	1	0	0	0	0	0	0
1100	7	2	29	1	1	1	2	2	1	2	2	2	0	0	0	0	0	1	0	0	0	0	0	1													0	0	0	0	0	1
1101	4	1	54	4	2	2	2	2	2	2	2	2
1102	4	1	50	4	2	2	2	2	2	2	2	2							0	0	0	0	1	0													0	0	0	0	1	0
1103	7	2	26	1	2	2	2	2	2	2	2	2
1104	5	1	60	5	2	2	2	2	1	2	2	2																									0	0	1	0	0	0
1105	12	2	73	6	2	2	2	2	2	2	2	2
1106	8	2	38	2	2	2	2	1	1	1	1	1																			0	0	0	0	1	0	0	0	1	1	1	0	1	0	0	0	0	0	1
1107	11	2	60	5	2	2	2	2	2	2	2	2							0	0	0	0	1	0													0	0	0	0	1	0
1108	7	2	27	1	2	2	2	2	2	2	2	2							0	0	1	0	0	0													0	0	1	0	0	0
1109	9	2	49	3	2	2	2	2	2	2	2	2
1110	3	1	42	3	2	2	2	2	2	2	2	2
1111	1	1	25	1	1	1	2	2	2	2	2	2	0	0	0	1	0	0	0	0	0	1	0	0
1112	1	1	23	1	2	2	2	2	1	2	2	2																									0	0	0	0	0	1
1113	11	2	62	5	2	2	1	2	1	2	2	2													1	1	1	0	0	0							1	1	1	0	0	0
1114	7	2	25	1	2	2	2	2	2	2	2	2
1115	1	1	28	1	2	2	2	2	2	2	2	2
1116	4	1	52	4	2	2	2	2	2	2	2	2
1117	4	1	54	4	2	2	2	2	2	2	2	2
1118	1	1	28	1	2	2	2	2	2	2	2	2							0	0	0	0	1	0													0	0	0	0	1	0
1119	8	2	31	2	2	2	2	2	2	2	2	2	0	0	0	0	1	0	0	0	0	0	1	0
1120	12	2	73	6	2	2	2	2	2	2	2	2
1121	8	2	35	2	2	2	2	2	2	2	2	2
1122	10	2	50	4	2	2	2	2	2	2	2	2
1123	4	1	57	4	2	2	2	2	2	2	2	2
1124	1	1	26	1	2	2	2	2	2	2	2	2													1	0	0	0	0	0	0	0	0	0	0	1	0	0	0	0	0	1
1125	5	1	61	5	2	2	2	2	2	2	2	2																																					0
1126	10	2	58	4	2	2	2	2	2	2	1	2							1	0	1	1	0	0																									0
1127	3	1	49	3	2	2	2	2	2	2	2	2
1128	6	1	70	6	2	1	1	1	2	1	2	1	0	0	0	0	0	1	0	0	0	0	0	1	0	0	0	0	0	1	0	0	0	0	0	1	1	1	0	0	0	0	0	0	0	0	0	1	1
1129	3	1	42	3	2	2	2	2	2	2	2	2
1130	7	2	24	1	2	2	2	2	2	2	2	2
1131	12	2	70	6	2	2	2	2	2	2	2	2	1	0	1	0	0	0																															0
1132	6	1	70	6	2	2	2	2	2	2	2	2	0	0	0	0	1	0	0	0	0	0	1	0													0	0	0	0	1	0							1
1133	11	2	63	5	2	2	2	2	2	2	2	2																									1	0	1	0	1	0
1134	11	2	61	5	1	2	2	2	1	2	1	2	0	0	0	1	0	0																			0	0	0	1	0	0							1
1135	11	2	69	5	2	2	2	2	2	2	2	2							0	0	0	1	0	0													0	0	1	1	0	0
1136	3	1	42	3	2	2	2	2	2	2	2	2	0	0	0	0	0	1	0	0	0	0	0	1													0	0	0	0	0	1
1137	4	1	57	4	2	2	2	1	1	2	2	2																			0	0	0	0	1	0	0	0	0	0	1	0
1138	4	1	56	4	2	2	2	2	2	2	2	2
1139	1	1	26	1	2	2	2	2	2	2	2	2
1140	9	2	49	3	2	1	2	2	2	2	2	2	1	0	0	0	0	0	1	1	0	0	0	0	0	0	0	1	1	0							1	1	0	0	0	0	0	0	1	0	0	0
1141	11	2	64	5	1	1	2	2	2	1	1	2	0	0	0	0	1	0	0	0	0	0	1	0																			1	1	1	1	1	0	0
1142	9	2	49	3	2	2	2	2	2	2	2	2
1143	2	1	31	2	2	2	2	2	2	2	2	2																									0	0	0	1	0	0
1144	4	1	59	4	1	2	2	2	1	1	1	2	0	0	0	0	0	1													0	0	0	0	0	1	1	1	1	1	1	0	1	0	0	0	0	0	1
1145	5	1	62	5	2	1	2	2	2	2	2	2							1	0	0	0	0	0
1146	2	1	38	2	2	2	2	2	2	2	2	2
1147	10	2	51	4	2	2	2	2	2	2	2	2
1148	4	1	56	4	2	1	2	2	2	2	2	2							0	0	0	0	0	1
1149	10	2	54	4	2	2	2	2	2	2	2	2	1	1	0	1	0	0	0	0	0	1	0	0	1	1	0	0	1	0							0	0	0	1	0	0	0	0	1	0	0	0	1
1150	5	1	61	5	2	2	2	2	2	2	2	2
1151	10	2	50	4	1	1	2	2	2	2	2	2	0	0	0	0	1	0	0	0	0	0	1	0
1152	3	1	48	3	2	2	2	2	2	2	2	2
1153	3	1	49	3	2	2	2	2	2	2	2	2
1154	10	2	55	4	2	2	2	2	2	2	2	2
1155	5	1	60	5	2	2	2	2	2	2	2	2
1156	2	1	30	2	2	1	2	1	2	2	2	2							0	0	0	0	0	0							1	0	0	1	1	0
1157	4	1	54	4	2	2	2	2	2	2	2	2							1	1	0	0	0	0													0	0	0	0	0	1							1
1158	11	2	64	5	2	2	2	2	2	2	2	2
1159	7	2	27	1	2	2	2	2	2	2	2	2
1160	1	1	29	1	2	2	2	2	2	2	2	2
1161	1	1	25	1	2	2	2	2	2	2	2	2
1162	12	2	70	6	2	2	2	2	2	2	2	2	0	0	0	1	0	0	0	0	0	1	0	0													0	0	0	1	0	0	0	0	0	1	0	0	0
1163	10	2	55	4	2	2	2	2	2	2	2	2
1164	12	2	76	6	1	1	2	2	2	2	1	2	0	0	1	1	1	0	0	0	1	1	1	0																									0
1165	3	1	42	3	2	2	2	2	2	2	2	2
1166	5	1	68	5	2	2	2	2	2	2	2	2																															0	0	0	0	0	1
1167	9	2	40	3	1	1	2	2	2	2	2	2	0	0	0	0	1	0	0	0	0	0	1	0
1168	7	2	23	1	2	2	2	2	2	2	2	2
1169	2	1	32	2	2	1	2	2	1	2	2	2							0	0	0	0	1	0													0	0	0	0	1	0
1170	12	2	71	6	1	1	2	2	1	2	2	2	1	0	1	0	1	0	1	0	1	0	1	0													0	0	1	0	1	0
1171	7	2	29	1	1	1	1	1	1	1	1	1	0	0	0	0	0	1	0	0	0	0	0	1	0	0	0	0	0	1	0	0	0	0	0	1	0	0	0	0	0	1	0	0	0	0	0	1	0
1172	12	2	74	6	1	1	2	2	1	2	1	1	0	0	0	0	1	0	0	0	0	0	1	0													0	0	0	0	1	0							0
1173	4	1	58	4	2	2	2	2	2	2	2	2	0	0	0	0	0	1
1174	2	1	34	2	1	2	2	2	2	2	2	2	0	0	0	0	0	1
1175	2	1	35	2	2	2	2	2	2	2	2	2
1176	10	2	59	4	2	2	2	2	2	2	2	2	0	0	1	0	0	0	0	0	1	0	0	0													0	0	1	0	0	0	0	0	1	0	0	0	0
1177	2	1	33	2	2	2	2	2	1	2	2	2							0	0	0	0	1	0													1	0	0	0	0	0
1178	10	2	55	4	2	2	2	2	2	2	2	2	0	0	0	0	0	1	0	0	0	0	0	1													0	0	0	0	0	1
1179	7	2	29	1	1	1	1	1	1	1	1	1	0	0	0	0	1	0	0	0	0	0	1	0	0	0	0	0	1	0	0	0	0	0	1	0	0	0	0	0	1	0	0	0	0	0	1	0	0
1180	11	2	65	5	2	2	2	2	2	2	2	2																									0	0	0	0	1	0
1181	3	1	46	3	2	2	2	1	2	2	1	2							0	0	0	0	0	1	0	0	0	0	0	1	0	0	0	0	0	1	0	0	0	0	0	1							0
1182	4	1	52	4	2	1	2	2	2	2	2	2	0	0	0	0	1	0	0	0	0	0	1	0	0	0	0	0	1	0	1	0	0	0	0	0	1	0	0	0	0	0	0	0	0	0	1	0	0
1183	3	1	44	3	2	2	2	2	2	2	2	2
1184	5	1	67	5	2	2	2	2	2	2	1	2																									0	0	0	0	1	0							0
1185	10	2	50	4	2	2	2	2	2	2	2	2
1186	5	1	64	5	2	2	2	2	2	2	2	2							0	0	0	0	0	1							0	0	0	0	0	1	0	0	0	0	0	1	0	0	0	0	0	1	0
1187	7	2	29	1	2	2	2	2	1	1	2	2																									1	1	0	0	0	0	1	0	1	0	0	0
1188	8	2	32	2	2	2	2	2	2	2	2	2							0	0	0	0	1	0													0	0	0	0	1	0
1189	8	2	37	2	1	1	2	1	1	2	2	2	0	0	1	0	1	0	0	0	1	0	1	0							0	0	1	0	1	0	0	0	1	0	1	0
1190	6	1	70	6	2	2	2	2	2	2	2	2
1191	8	2	30	2	2	2	2	2	2	2	2	2							0	0	0	1	1	0
1192	8	2	37	2	1	1	2	2	1	2	1	2	0	0	0	0	0	1	0	0	0	0	0	1													0	0	0	0	0	1							0
1193	11	2	65	5	2	2	2	2	2	2	2	2
1194	7	2	22	1	2	2	2	2	2	2	2	2
1195	5	1	62	5	2	2	2	1	1	2	1	2																			1	0	0	0	0	0	1	0	0	0	0	0							1
1196	3	1	41	3	2	2	2	2	2	2	2	2
1197	7	2	25	1	2	2	2	2	2	2	2	2	0	0	0	0	0	1																			0	0	0	0	0	1
1198	2	1	38	2	2	2	2	2	2	2	2	2
1199	8	2	33	2	2	2	2	2	2	2	2	2													0	0	0	0	0	1
1200	3	1	45	3	2	2	2	2	2	2	2	2
1201	8	2	39	2	2	1	2	2	1	2	2	2							0	0	0	0	0	1													0	0	0	0	0	1
1202	4	1	57	4	1	1	2	2	2	2	2	2	1	0	0	0	1	0	0	0	0	0	1	0							1	1	0	0	1	0
1203	6	1	73	6	2	2	2	2	2	2	2	2
1204	3	1	42	3	2	2	2	2	2	2	2	2	0	0	0	0	0	1	0	0	0	0	0	1													0	0	0	0	0	1
1205	7	2	27	1	2	1	2	2	2	2	1	2							0	0	0	1	0	0							0	0	0	1	0	0							0	0	0	0	1	0	1
1206	10	2	56	4	2	2	2	2	2	2	2	2	1	0	0	0	0	0	1	0	0	0	0	0							0	0	0	0	1	0	1	0	0	0	0	0							1
1207	12	2	70	6	2	2	2	2	2	2	2	2							1	0	0	0	0	0													1	0	0	0	0	0							0
1208	3	1	47	3	2	2	2	2	2	2	2	2
1209	3	1	41	3	2	2	2	2	2	2	2	2
1210	10	2	54	4	2	2	2	2	2	2	2	2
1211	1	1	25	1	2	2	2	2	2	2	2	2
1212	8	2	35	2	2	2	2	2	2	2	2	2
1213	7	2	29	1	2	2	2	2	2	2	2	2
1214	4	1	51	4	2	2	2	2	1	2	2	2																									0	0	1	1	0	0
1215	7	2	26	1	1	1	2	2	1	2	2	2	0	0	0	1	0	0	0	0	0	1	0	0													1	0	0	0	0	0
1216	2	1	36	2	2	2	2	2	2	2	2	2
1217	9	2	42	3	2	2	2	2	2	2	2	2
1218	11	2	65	5	2	2	2	2	2	2	2	2
1219	10	2	55	4	2	2	2	2	1	2	1	2																									0	0	0	0	0	1							1
1220	8	2	33	2	2	2	2	2	2	2	2	2
1221	5	1	62	5	2	1	1	1	2	2	1	2	0	0	1	0	0	0	0	0	1	0	0	0	0	0	1	0	0	0	0	0	1	0	0	0	0	0	1	0	0	0							0
1222	4	1	50	4	2	2	2	2	2	2	2	2
1223	2	1	38	2	2	2	2	2	2	2	2	2	0	0	0	0	0	1
1224	1	1	28	1	1	2	2	2	1	2	2	2	0	0	0	1	0	0																			0	0	0	1	0	0
1225	3	1	48	3	2	2	2	2	2	2	2	2
1226	5	1	61	5	2	2	2	2	2	2	2	2																									1	0	1	0	0	0							1
1227	7	2	25	1	2	2	2	2	2	2	2	2
1228	7	2	27	1	2	2	2	1	2	2	2	2																			0	0	0	0	0	1
1229	5	1	60	5	2	2	2	2	2	2	2	2
1230	6	1	71	6	2	2	2	2	2	2	2	2
1231	9	2	47	3	2	2	2	2	2	2	2	2
1232	4	1	53	4	2	2	2	2	2	2	2	2
1233	6	1	73	6	2	2	2	2	2	2	2	2
1234	3	1	41	3	2	2	2	2	2	2	2	2
1235	6	1	75	6	2	2	2	2	2	2	2	2							1	1	1	0	1	0													1	1	1	0	0	0
1236	9	2	45	3	1	1	2	2	1	2	2	2	0	0	0	0	0	1	1	1	0	0	0	0													0	0	0	0	0	1
1237	3	1	43	3	2	2	2	2	2	2	2	2
1238	3	1	49	3	2	1	1	2	2	2	2	2							1	0	0	1	1	0	1	0	0	0	1	0
1239	12	2	74	6	2	2	2	2	2	2	2	2
1240	11	2	66	5	2	2	2	2	2	2	2	2
1241	9	2	48	3	2	2	2	2	2	2	2	2
1242	11	2	64	5	2	2	2	2	2	2	2	2
1243	11	2	61	5	2	2	2	2	2	2	2	2																															0	0	0	0	1	0
1244	9	2	49	3	2	2	2	2	2	2	2	2	0	0	1	0	1	0													0	0	0	0	1	0	0	0	1	0	1	0	0	0	0	0	0	1
1245	5	1	65	5	2	1	1	1	2	2	2	2	1	0	0	0	0	0	1	0	0	0	0	0	1	0	0	0	0	0	0	0	0	0	0	1	0	0	0	0	0	1
1246	1	1	25	1	2	2	2	2	2	2	2	2
1247	5	1	64	5	2	2	2	2	2	2	2	2
1248	9	2	42	3	2	2	2	2	2	2	2	2							0	0	1	1	1	0
1249	3	1	47	3	2	2	1	2	2	2	2	2													1	0	0	0	0	0
1250	3	1	42	3	2	2	2	2	2	2	2	2
1251	5	1	64	5	1	1	2	2	2	2	2	2	1	1	0	1	0	0	1	1	0	1	0	0
1252	5	1	63	5	2	2	2	2	2	2	2	2
1253	12	2	71	6	2	2	2	2	2	2	2	2							0	0	0	0	0	1													0	0	0	0	0	1	0	0	0	0	0	1	0
1254	5	1	68	5	2	1	2	2	2	2	2	2							1	0	1	0	0	0
1255	7	2	28	1	2	2	2	2	2	2	2	2
1256	5	1	69	5	2	2	2	2	2	2	2	2
1257	6	1	75	6	2	2	2	2	1	2	2	2																									0	0	0	0	1	0
1258	5	1	68	5	2	2	2	2	2	2	2	2
1259	4	1	58	4	2	2	2	2	2	2	2	2	1	0	0	1	1	0	1	0	0	1	1	0	0	0	0	0	1	0	0	0	0	0	1	0
1260	6	1	70	6	2	1	2	2	1	2	2	2							0	0	0	0	1	0													0	0	0	0	1	0							1
1261	5	1	60	5	2	2	2	2	2	2	2	2
1262	5	1	63	5	1	2	2	1	1	1	1	1	0	0	0	0	0	1													0	0	0	0	0	1	0	0	0	0	0	1	0	0	0	0	0	1	0
1263	5	1	62	5	2	2	2	2	2	2	2	2																			0	0	0	0	0	1	1	0	0	0	0	0
1264	12	2	75	6	2	2	2	2	2	2	2	2
1265	6	1	71	6	2	2	2	2	2	2	2	1
1266	2	1	33	2	1	2	2	2	1	2	1	2	0	0	0	1	1	0																			0	0	0	1	1	0							0
1267	6	1	78	6	2	2	2	2	2	2	2	2
1268	6	1	71	6	2	2	2	2	2	2	2	2
1269	6	1	70	6	2	2	2	2	2	2	2	2
1270	6	1	74	6	2	2	2	2	2	2	2	2	1	0	0	0	0	0																			1	0	0	0	0	0
1271	6	1	78	6	2	2	2	2	2	1	2	2	0	0	0	0	0	1	0	0	0	0	0	1							0	0	0	0	0	1							1	1	0	0	0	0
1272	10	2	53	4	2	2	2	2	2	2	2	2
1273	10	2	58	4	2	2	2	2	2	2	2	2	0	0	1	0	0	0	0	0	1	1	0	0	1	1	0	0	0	0	0	0	1	1	0	0	0	0	1	1	0	0							1
1274	1	1	25	1	2	2	2	2	1	2	2	2	0	0	0	0	0	1	0	0	0	0	0	1													0	0	0	0	0	1
1275	4	1	58	4	2	2	2	2	2	2	2	2
1276	9	2	43	3	2	2	2	2	2	2	2	2
1277	4	1	59	4	2	2	2	2	2	2	2	2
1278	6	1	76	6	2	2	2	2	2	2	2	2
1279	9	2	48	3	1	1	2	2	1	2	1	2	1	0	0	0	0	0	1	0	0	0	0	0													1	0	0	0	0	0							1
1280	6	1	74	6	2	2	2	2	2	2	2	2																																					1
1281	6	1	72	6	2	2	2	2	2	2	2	2
1282	6	1	72	6	2	2	2	2	1	2	2	2																									0	0	1	0	1	0
1283	8	2	36	2	2	2	2	2	2	2	2	2
1284	5	1	67	5	2	2	2	2	2	2	2	2	0	0	0	1	0	0	0	0	0	1	1	0
1285	6	1	74	6	2	2	2	2	2	2	2	2
1286	1	1	25	1	2	2	2	2	2	2	2	2
1287	7	2	22	1	2	2	2	2	2	2	2	2
1288	7	2	27	1	2	2	2	2	2	2	2	2
1289	3	1	40	3	2	2	2	2	2	2	2	2
1290	2	1	37	2	2	2	2	2	2	2	2	2
1291	9	2	42	3	2	2	2	2	2	2	2	2
1292	7	2	22	1	2	2	2	1	1	2	2	2																			0	0	0	0	0	1	1	0	0	0	0	0
1293	6	1	71	6	2	2	2	2	2	2	2	2																									0	0	0	0	1	0
1294	8	2	36	2	2	2	2	2	2	2	2	2
1295	5	1	61	5	2	2	2	2	2	2	2	2
1296	9	2	48	3	1	1	1	1	1	2	1	2	0	0	0	0	1	0	0	0	0	0	1	0	0	0	0	0	0	1	0	0	1	0	1	0	0	0	0	0	1	0							0
1297	5	1	67	5	2	2	2	2	2	2	2	2							0	0	0	0	1	0																			0	0	0	0	1	0	0
1298	2	1	37	2	2	2	2	2	2	2	2	2
1299	11	2	63	5	2	2	2	2	2	2	2	2
1300	3	1	48	3	2	2	1	2	2	2	1	2													0	0	0	0	0	1							0	0	0	0	0	1							0
1301	2	1	36	2	2	2	2	2	2	2	2	2
1302	2	1	31	2	2	2	2	2	2	2	2	2
1303	2	1	31	2	2	2	2	2	2	2	2	2
1304	6	1	72	6	2	1	2	2	1	2	2	2							0	0	0	0	0	1													0	0	0	0	0	1
1305	6	1	75	6	2	2	2	2	2	1	2	2																															1	0	0	0	0	0
1306	6	1	75	6	2	2	2	2	2	2	2	2
1307	8	2	37	2	2	2	2	2	1	2	2	2																			1	0	0	0	0	0	0	0	0	0	0	0
1308	12	2	70	6	2	1	2	2	2	2	2	2	0	0	0	0	0	1	0	0	0	0	0	1
1309	5	1	68	5	2	2	2	2	2	2	2	2
1310	2	1	38	2	2	2	2	2	2	2	2	2	0	0	0	0	0	1	0	0	0	0	0	1	0	0	0	0	0	1	0	0	0	0	0	1	0	0	0	0	0	1
1311	12	2	76	6	2	2	2	2	2	2	2	2
1312	6	1	75	6	2	2	2	2	2	2	2	2
1313	12	2	71	6	2	2	2	2	2	2	2	2	0	0	0	0	1	0	0	0	0	0	1	0													1	0	0	0	0	0							0
1314	4	1	56	4	2	1	2	2	2	2	2	2							1	1	0	0	0	0																			1	1	0	0	0	0
1315	8	2	35	2	2	2	2	2	2	1	2	2	0	0	0	1	0	0	0	0	0	1	0	0													0	0	0	1	1	0	0	0	0	0	1	0
1316	6	1	75	6	1	1	2	1	1	2	1	2	0	0	0	0	0	1	0	0	0	0	0	1							0	0	0	0	0	1	0	0	0	0	0	1							0
1317	2	1	38	2	1	1	1	1	1	2	1	1	0	0	0	0	0	1	0	0	0	0	0	1	0	0	0	0	0	1	0	0	0	0	0	1	0	0	0	0	0	1							0
1318	1	1	26	1	2	2	2	2	2	2	2	2
1319	12	2	73	6	2	2	2	2	2	2	2	2																																					1
1320	12	2	72	6	2	2	2	2	2	2	2	2
1321	7	2	26	1	2	2	2	2	2	2	2	2
1322	1	1	25	1	2	2	2	2	2	2	2	2
1323	12	2	74	6	2	2	2	1	1	2	2	2	0	0	0	0	0	1	0	0	0	0	0	1							1	0	0	0	0	0	1	0	0	0	0	0							1
1324	6	1	76	6	2	2	2	2	2	2	2	2
1325	6	1	72	6	1	2	2	2	1	2	2	2	1	0	0	0	1	0																			1	0	0	1	1	0							1
1326	4	1	55	4	2	2	2	2	2	2	2	2
1327	6	1	72	6	2	2	2	2	2	2	2	2																															1	0	0	0	0	0
1328	7	2	26	1	2	2	2	2	2	2	1	2	0	0	0	0	1	0	0	0	0	0	1	0																									0
1329	6	1	71	6	2	2	2	2	2	2	2	2																									0	0	0	0	0	1
1330	10	2	52	4	2	2	2	2	1	2	2	2																									0	0	0	0	1	0
1331	1	1	27	1	2	2	2	2	2	2	2	2
1332	6	1	79	6	2	2	2	2	1	2	2	2							0	0	0	0	0	1													0	0	1	0	1	0							0
1333	6	1	78	6	2	2	2	2	2	2	2	2																									0	0	0	0	1	0							1
1334	5	1	69	5	2	2	2	2	2	2	1	2																																					0
1335	3	1	47	3	2	2	2	2	2	2	2	2																									0	0	1	0	0	0
1336	11	2	63	5	2	2	2	1	2	2	2	2	0	0	0	0	1	0	0	0	0	0	1	0	0	0	0	0	1	0	0	0	0	0	1	0
1337	2	1	35	2	2	2	2	2	2	2	2	2
1338	2	1	33	2	2	2	2	2	2	2	2	2
1339	12	2	74	6	2	2	2	2	2	2	2	2
1340	3	1	48	3	2	2	2	2	2	2	2	2
1341	4	1	50	4	2	2	2	2	2	2	2	2
1342	6	1	75	6	2	2	2	2	2	2	2	2
1343	12	2	78	6	2	2	2	2	2	2	1	2							0	0	0	1	0	0																									0
1344	11	2	60	5	2	2	2	1	2	2	2	2																			1	1	0	0	0	0
1345	11	2	69	5	2	2	2	2	2	2	2	2
1346	10	2	52	4	2	2	2	2	1	2	2	2	0	0	0	0	1	0	0	0	0	0	1	0													0	0	0	0	1	0
1347	3	1	45	3	2	2	2	2	2	2	2	2
1348	2	1	33	2	1	1	1	1	1	1	1	1	1	0	0	0	0	0	1	0	0	0	0	0	1	0	0	0	0	0	1	0	0	0	0	0	1	0	0	0	0	0	1	0	0	0	0	0	1
1349	5	1	62	5	2	2	2	2	2	2	2	2
1350	11	2	64	5	1	1	1	1	1	1	1	1	0	0	1	0	0	0	0	0	1	0	0	0	0	0	1	0	0	0	0	0	1	0	0	0	0	0	1	0	0	0	0	0	1	0	0	0	0
1351	12	2	71	6	2	2	2	2	2	2	2	2
1352	6	1	71	6	2	2	2	1	1	2	2	2																			0	0	0	0	1	0	1	0	0	0	0	0
1353	6	1	72	6	2	2	2	1	2	2	2	2																			0	0	0	0	1	0
1354	4	1	59	4	2	2	2	2	2	2	2	2							0	0	0	1	0	0
1355	5	1	62	5	2	2	2	2	2	2	2	1
1356	10	2	59	4	1	2	2	2	2	2	2	2	0	0	0	0	1	0
1357	8	2	33	2	2	2	2	2	2	2	2	2
1358	7	2	28	1	2	2	2	2	2	2	2	2
1359	6	1	74	6	2	2	2	2	1	2	2	2																									1	0	1	1	0	0							1
1360	6	1	71	6	2	2	2	2	2	2	2	2																									0	0	0	0	1	0
1361	5	1	60	5	2	2	2	2	2	2	2	2																									1	0	0	1	0	0
1362	1	1	29	1	2	2	2	2	2	2	2	2							0	0	0	0	0	1																			0	0	0	0	0	1	0
1363	10	2	54	4	2	2	2	2	2	2	2	2
1364	11	2	61	5	2	2	2	2	2	2	2	2																			1	0	0	0	0	0	0	0	0	0	1	0							0
1365	10	2	52	4	2	2	2	2	2	2	2	2
1366	3	1	46	3	2	2	2	2	2	2	2	2
1367	10	2	51	4	2	2	2	2	2	2	2	2
1368	4	1	53	4	2	2	2	2	2	2	2	2
1369	8	2	31	2	1	1	2	1	1	2	2	2	0	0	0	1	0	0	0	0	0	1	0	0							0	0	0	1	0	0	0	0	0	1	0	0
1370	1	1	23	1	2	1	2	2	1	2	2	2	0	0	1	1	0	0	0	0	1	1	0	0													0	0	0	0	0	1
1371	6	1	73	6	2	2	2	2	2	2	2	2
1372	5	1	63	5	2	2	2	2	2	2	2	2
1373	10	2	59	4	2	2	2	1	2	2	2	2	1	0	1	0	0	0	1	0	1	0	0	0							0	0	0	0	1	0	0	0	0	0	1	0	1	1	0	0	0	0
1374	6	1	73	6	1	2	2	1	2	2	2	2	1	0	0	0	0	0													1	0	0	0	0	0	0	0	0	0	1	0	0	0	0	0	0	1	0
1375	5	1	69	5	2	2	2	2	2	2	2	2	0	0	0	0	0	1	0	0	0	0	0	1	0	0	0	0	0	1							0	0	0	0	0	1							0
1376	11	2	62	5	2	2	2	2	2	2	2	2																									0	0	0	0	0	1
1377	5	1	65	5	2	2	2	2	2	2	2	2
1378	4	1	59	4	2	2	2	2	2	2	2	2
1379	12	2	70	6	2	2	2	2	2	2	1	2																																					1
1380	8	2	35	2	2	2	2	2	2	2	2	2
1381	9	2	41	3	1	1	2	2	1	1	2	2	0	0	0	0	0	1	0	0	0	0	0	1													0	0	0	0	0	1	0	0	0	0	0	1
1382	3	1	46	3	2	2	2	2	2	2	2	2
1383	10	2	57	4	2	2	2	2	2	2	2	2
1384	8	2	32	2	2	1	2	2	2	2	2	2							0	0	0	1	1	0
1385	8	2	33	2	2	2	2	2	2	2	2	2																																					0
1386	8	2	38	2	2	2	2	2	1	2	2	2																									0	0	1	0	0	0
1387	2	1	36	2	2	2	2	2	2	2	2	2
1388	11	2	63	5	2	2	2	2	1	2	1	1	0	0	0	0	1	0	0	0	0	1	1	0													0	0	0	1	1	0							0
1389	5	1	66	5	2	2	2	2	2	2	2	2																									0	0	0	1	0	0
1390	11	2	67	5	2	2	2	2	2	2	2	2							0	0	0	0	1	0																									0
1391	10	2	53	4	1	1	2	2	1	1	2	2	0	0	1	0	0	0	0	0	1	0	0	0													0	0	1	0	0	0	0	0	1	0	0	0
1392	5	1	60	5	2	2	2	2	2	2	2	2																									0	0	0	0	0	1
1393	4	1	51	4	2	2	2	2	2	2	2	2	0	0	0	1	1	0	0	0	0	1	1	0													0	0	0	1	1	0	0	0	0	0	0	1
1394	6	1	75	6	2	2	2	2	2	2	2	2
1395	4	1	54	4	2	2	2	2	1	2	2	2																									1	1	0	1	0	0
1396	11	2	60	5	2	2	2	2	2	2	2	2
1397	5	1	69	5	2	2	2	2	2	2	2	2
1398	6	1	78	6	2	1	2	2	2	2	2	2							1	0	0	0	0	0
1399	8	2	35	2	2	2	2	2	2	2	2	2
1400	7	2	23	1	2	2	2	2	2	2	2	2													1	0	0	0	0	0
1401	1	1	27	1	2	2	2	2	2	2	2	2
1402	8	2	38	2	2	2	2	2	2	2	2	2
1403	12	2	76	6	2	1	2	2	2	2	2	2							1	0	0	0	0	0
1404	10	2	51	4	2	1	2	2	1	2	2	2							0	0	0	0	1	0													0	0	0	0	1	0
1405	8	2	36	2	2	1	1	2	2	2	2	2							0	0	0	0	0	1	0	0	0	0	1	0
1406	6	1	74	6	2	2	2	2	2	2	2	2
1407	1	1	27	1	2	2	2	2	2	2	2	2
1408	6	1	75	6	2	2	2	2	2	2	2	2
1409	4	1	54	4	2	2	2	2	1	2	2	2							1	0	0	0	1	0													1	0	0	0	1	0
1410	6	1	74	6	2	2	2	2	2	2	2	2	1	0	0	0	0	0	1	0	0	0	0	0							1	0	0	0	0	0	1	0	0	0	0	0	1	0	0	0	0	0
1411	10	2	58	4	2	2	2	2	2	2	2	2
1412	5	1	67	5	2	2	2	2	2	2	2	2
1413	8	2	39	2	2	2	2	2	2	2	2	2
1414	8	2	35	2	2	2	2	2	2	2	2	2
1415	2	1	38	2	2	2	2	2	2	2	2	2
1416	6	1	74	6	2	2	2	2	2	2	2	2	0	0	0	0	0	1							1	0	0	0	0	0							1	0	0	0	0	0							1
1417	8	2	34	2	1	1	2	1	1	2	2	2	1	1	1	1	1	0	1	1	1	1	1	0							0	0	0	1	1	0	1	1	1	1	1	0	0	0	0	0	1	0
1418	12	2	70	6	2	2	2	2	1	2	2	2																			0	0	0	0	1	0	0	0	0	0	1	0
1419	6	1	74	6	2	2	2	2	2	2	2	2							0	0	0	0	1	0																									0
1420	9	2	44	3	1	1	2	2	1	2	2	2	0	0	1	0	0	0	0	0	1	0	1	0							0	0	1	0	0	0	1	0	1	0	1	0
1421	6	1	74	6	2	2	2	2	1	2	2	2																									0	0	0	0	0	1
1422	6	1	71	6	2	2	2	2	2	2	2	2							1	0	0	0	0	0							1	0	0	0	0	0	1	0	0	0	0	0
1423	2	1	39	2	2	2	2	2	2	2	2	2
1424	2	1	35	2	2	2	2	2	2	2	2	2
1425	5	1	60	5	2	2	2	2	1	2	2	2																									0	0	1	0	1	0
1426	4	1	58	4	2	2	2	2	2	2	2	2
1427	6	1	76	6	2	2	2	2	2	2	2	2
1428	6	1	72	6	2	2	2	2	2	2	2	2	0	0	0	0	0	1	0	0	0	0	0	1													0	0	0	0	1	0
1429	10	2	58	4	2	2	2	2	2	2	2	2	1	1	0	0	0	0	1	1	0	0	1	0	1	1	0	0	0	0	1	1	0	0	1	0	1	1	0	0	1	0							1
1430	7	2	26	1	2	2	2	2	2	2	2	2
1431	11	2	64	5	2	2	2	2	2	2	2	2
1432	10	2	50	4	2	2	2	2	2	1	2	2							1	1	0	0	0	0							0	0	0	0	1	0	1	0	0	0	0	0	1	0	0	0	0	0
1433	10	2	51	4	2	2	2	2	2	2	2	2
1434	5	1	66	5	1	1	2	2	1	2	1	2	0	0	0	0	1	0	0	0	0	0	1	0													0	0	0	0	1	0							0
1435	4	1	57	4	2	2	2	2	2	2	2	2	1	1	1	1	1	0	1	1	1	1	1	0													1	1	1	1	1	0							0
1436	5	1	65	5	1	2	2	2	1	2	2	2	0	0	0	0	1	0																			0	0	0	0	1	0
1437	12	2	70	6	2	2	2	2	2	2	2	2	0	0	0	0	1	0	0	0	0	0	1	0
1438	11	2	62	5	2	2	2	2	2	2	2	2	0	0	0	0	0	1	0	0	0	0	0	1							0	0	0	0	0	1	0	0	0	0	0	1	0	0	0	0	0	1
1439	1	1	28	1	1	1	2	2	1	1	2	2	0	0	0	0	1	0	0	0	0	0	1	0													0	0	0	0	1	0	0	0	0	0	1	0
1440	6	1	72	6	2	2	2	2	2	2	2	2
1441	12	2	72	6	2	2	2	2	2	1	1	2							0	0	0	0	1	0																			0	0	0	0	1	0	0
1442	2	1	39	2	2	2	2	2	2	2	2	2
1443	10	2	51	4	1	1	2	2	2	2	2	2	0	0	0	0	1	0	0	0	0	0	1	0
1444	6	1	73	6	2	2	2	2	2	2	2	2																									1	1	1	1	1	0
1445	6	1	72	6	2	2	2	2	2	2	2	2	0	0	0	0	1	0	0	0	0	0	1	0
1446	8	2	39	2	2	2	2	2	2	2	2	2							0	0	0	0	0	1
1447	12	2	72	6	1	1	2	2	1	1	2	2	0	0	1	0	0	0	0	0	1	0	0	0													0	0	1	0	0	0	0	0	1	0	0	0
1448	4	1	52	4	2	2	2	2	2	2	2	2
1449	10	2	51	4	2	2	2	2	2	2	2	2
1450	4	1	51	4	2	2	2	2	1	2	2	2																									0	0	0	1	0	0
1451	1	1	26	1	2	1	2	2	2	2	2	2							0	0	0	0	1	0													0	0	0	0	1	0
1452	5	1	62	5	2	2	2	2	2	2	2	2																																					1
1453	2	1	39	2	2	2	2	2	2	2	2	2
1454	5	1	62	5	2	2	2	2	2	2	2	2
1455	10	2	56	4	2	2	2	2	1	2	2	2																									0	0	0	0	1	0
1456	12	2	72	6	2	2	2	2	2	2	2	2																			0	0	0	0	1	0
1457	7	2	27	1	1	1	2	2	1	1	2	2	1	1	1	1	1	0	1	1	1	1	1	0													1	1	1	1	1	0	0	0	0	0	0	1
1458	3	1	46	3	2	2	2	2	1	2	2	2																									0	0	0	0	0	1
1459	6	1	72	6	1	2	1	1	1	2	2	2	0	0	0	0	0	1							0	0	0	0	0	1	0	0	0	0	0	1	1	0	0	0	0	0
1460	11	2	61	5	2	2	2	2	2	1	1	2																															0	0	0	0	0	1	0
1461	12	2	74	6	2	2	2	2	2	2	2	2
1462	5	1	61	5	2	2	2	2	2	2	2	2
1463	10	2	54	4	1	1	2	2	1	2	1	2	0	0	1	0	0	0	0	0	1	0	0	0													0	0	1	0	0	0							0
1464	6	1	75	6	2	2	2	2	2	2	2	2
1465	9	2	44	3	2	2	2	2	2	2	2	2	0	0	1	0	1	0	0	0	1	0	1	0	0	0	1	0	1	0							0	0	1	0	1	0
1466	6	1	72	6	2	2	2	2	2	2	2	2																									0	0	0	0	0	1							0
1467	6	1	77	6	2	2	2	2	2	2	2	2
1468	3	1	45	3	2	2	2	2	2	2	2	2							0	0	0	0	0	1													0	0	0	0	0	1
1469	5	1	67	5	1	1	2	2	1	2	1	2	0	0	0	0	0	1	0	0	0	0	0	1													1	0	0	0	0	0							0
1470	5	1	65	5	2	2	2	2	1	2	2	2																									0	0	0	0	0	1
1471	8	2	35	2	2	2	2	2	2	2	2	2
1472	7	2	26	1	2	2	2	2	2	2	2	2
1473	12	2	78	6	2	2	2	2	2	2	2	2																															1	0	0	0	0	0
1474	2	1	34	2	2	2	2	2	2	2	2	2
1475	3	1	47	3	2	2	2	2	2	2	2	2
1476	4	1	55	4	2	2	2	2	2	2	2	2
1477	3	1	48	3	1	1	2	2	1	2	2	2	0	0	1	0	1	0	0	0	0	0	1	0													0	0	0	0	1	0
1478	12	2	70	6	2	2	2	2	1	2	1	2																									0	0	0	0	1	0							0
1479	6	1	70	6	2	2	2	2	2	2	2	2
1480	3	1	47	3	2	2	2	2	2	2	2	2
1481	9	2	47	3	2	2	2	2	2	2	2	2
1482	2	1	37	2	2	2	2	2	2	2	2	2
1483	7	2	25	1	2	2	2	2	2	2	2	2
1484	3	1	45	3	2	2	2	2	2	2	2	2
1485	2	1	39	2	2	2	2	2	2	2	2	2							0	0	0	1	1	0													0	0	0	1	1	0
1486	11	2	61	5	2	2	2	2	2	2	2	2	0	0	0	0	0	1	0	0	0	0	0	1																			0	0	0	0	1	0
1487	1	1	24	1	1	1	2	2	2	2	2	2	0	0	0	0	0	1	0	0	0	0	0	1
1488	6	1	77	6	2	2	2	2	2	2	2	2																									0	0	0	0	1	0
1489	4	1	52	4	2	2	2	2	2	2	2	2
1490	6	1	73	6	2	2	2	2	2	2	2	2																															0	0	0	0	0	0
1491	8	2	39	2	2	2	2	2	2	2	2	2
1492	10	2	51	4	2	2	2	2	2	2	2	2	0	0	0	0	0	1	0	0	0	0	0	1													0	0	0	0	0	1
1493	6	1	72	6	2	2	2	2	2	2	2	2																									1	0	1	0	0	0
1494	7	2	25	1	1	1	2	2	1	2	2	2	0	0	1	0	1	0	0	0	1	0	1	0													0	0	1	0	1	0
1495	1	1	27	1	2	2	2	2	2	2	2	2
1496	2	1	39	2	2	2	2	2	1	2	2	2																									0	0	0	1	0	0
1497	3	1	46	3	2	2	2	2	2	2	2	2
1498	4	1	50	4	2	2	2	2	2	2	2	2
1499	12	2	76	6	2	2	2	2	2	2	2	2																									1	0	0	0	1	0
1500	4	1	50	4	2	2	2	2	2	2	2	2
1501	3	1	46	3	2	2	2	2	2	2	2	2																			0	0	0	0	0	1													0
1502	12	2	74	6	2	1	2	2	2	2	2	2							0	0	0	0	1	0
1503	7	2	29	1	2	2	2	2	2	2	2	2																									0	0	0	0	0	1
1504	8	2	36	2	2	2	2	1	1	1	1	2																			0	0	0	0	0	1	0	0	0	0	1	0	0	0	0	0	0	1	0
1505	5	1	66	5	2	1	2	2	2	2	2	2							0	0	0	0	0	1
1506	7	2	26	1	2	2	2	2	2	2	2	2
1507	2	1	38	2	2	2	2	2	2	2	2	1																																					1
1508	10	2	53	4	2	2	2	2	2	2	2	2
1509	9	2	41	3	2	2	2	2	2	2	2	2
1510	12	2	70	6	2	2	2	2	2	2	2	2							1	1	0	0	0	0
1511	5	1	60	5	2	2	2	2	2	2	2	2																			0	0	0	0	1	0	0	0	0	0	1	0
1512	6	1	77	6	2	2	2	2	2	2	2	2																									0	0	1	0	0	0							0
1513	10	2	51	4	2	2	2	2	1	2	1	1	1	0	0	0	1	0	0	0	0	0	1	0							1	0	0	0	1	0	1	0	0	0	1	0	0	0	0	0	0	1	0
1514	12	2	70	6	2	2	2	2	2	2	2	2
1515	7	2	28	1	2	2	2	2	2	2	2	2
1516	12	2	76	6	2	2	2	2	2	2	2	2	0	0	0	0	1	0	0	0	0	0	1	0													0	0	0	0	1	0
1517	8	2	39	2	2	2	2	2	2	2	2	2
1518	12	2	75	6	2	2	2	2	2	2	2	2
1519	11	2	60	5	2	2	2	2	2	2	2	2
1520	5	1	61	5	2	2	2	2	1	2	1	1	0	0	0	0	1	0	0	0	0	0	1	0													0	0	0	0	1	0							0
1521	2	1	39	2	2	2	2	2	2	2	2	2
1522	5	1	69	5	2	2	2	2	2	2	2	2
1523	3	1	47	3	2	2	2	2	2	2	2	2
1524	2	1	39	2	2	2	2	2	2	2	2	2							0	0	0	0	0	1
1525	6	1	79	6	2	2	2	2	2	2	2	2																									1	0	0	0	0	0							0
1526	6	1	73	6	2	2	2	2	2	2	2	2
1527	12	2	71	6	2	2	2	2	2	2	2	2
1528	5	1	66	5	2	2	2	2	2	2	2	2																									1	1	0	0	1	0
1529	9	2	49	3	2	2	2	2	2	2	2	2
1530	4	1	59	4	2	2	2	2	2	2	1	2																																					0
1531	12	2	79	6	2	2	2	1	2	2	1	2																			1	1	0	0	1	0													1
1532	6	1	75	6	2	2	2	2	2	2	2	2																			1	0	0	0	0	0
1533	9	2	41	3	2	2	2	1	1	1	1	2																			0	0	0	0	1	0	0	0	0	0	1	0	0	0	0	0	1	0	0
1534	10	2	51	4	1	1	2	1	1	2	2	2	0	0	0	0	0	1	0	0	0	0	1	0							0	0	0	0	1	0	0	0	0	0	1	0
1535	4	1	58	4	2	1	2	2	2	2	1	2							0	0	0	0	0	1	1	0	0	0	0	0	1	0	0	0	0	0													0
1536	10	2	55	4	2	2	2	2	1	2	2	2																									0	0	0	1	0	0
1537	8	2	31	2	1	2	2	2	2	2	2	2	0	0	1	1	0	0	0	0	1	1	0	0													1	0	1	1	0	0
1538	6	1	70	6	2	2	2	2	1	2	2	1																									1	0	1	0	0	0
1539	12	2	75	6	2	2	2	2	2	2	2	2
1540	6	1	75	6	2	2	2	2	2	2	2	2																									0	0	0	0	1	0
1541	11	2	60	5	2	2	2	2	2	2	2	2	0	0	0	0	0	1	0	0	0	0	0	1							1	0	0	0	0	0
1542	9	2	48	3	2	2	1	2	2	2	2	2													0	0	0	0	0	1
1543	6	1	79	6	2	2	2	2	2	2	2	1
1544	10	2	54	4	2	2	2	1	2	2	2	2	0	0	0	0	1	0	0	0	0	0	1	0							1	1	0	0	0	0
1545	8	2	31	2	2	1	2	1	2	2	2	2							0	0	0	0	1	0							0	0	0	0	0	1
1546	12	2	72	6	2	2	2	2	2	2	2	2
1547	8	2	35	2	2	1	2	2	2	2	2	2							0	0	0	0	1	0
1548	5	1	64	5	2	2	2	2	2	2	2	2
1549	9	2	45	3	1	1	2	2	1	2	2	1	0	0	0	0	1	0	0	0	0	0	1	0							0	0	0	0	1	0	1	1	0	1	0	0	0	0	0	0	1	0
1550	11	2	62	5	2	2	2	2	2	2	2	2
1551	12	2	70	6	2	2	2	2	2	2	2	2
1552	12	2	75	6	2	2	2	2	2	2	2	2
1553	7	2	23	1	2	2	2	2	2	2	2	2	0	0	0	0	0	1	0	0	0	0	0	1													0	0	0	0	0	1
1554	9	2	45	3	2	2	2	2	2	2	2	2
1555	7	2	23	1	2	2	2	2	2	2	2	2
1556	2	1	36	2	2	2	2	2	1	2	2	2																									0	0	0	0	1	0
1557	12	2	73	6	2	2	2	2	2	2	2	2							1	0	1	0	1	0
1558	12	2	71	6	2	2	2	2	2	2	2	2																			1	0	0	0	0	0							1	1	0	0	0	0
1559	8	2	34	2	2	2	2	2	2	2	2	2
1560	10	2	55	4	2	2	2	2	2	2	2	2
1561	1	1	27	1	2	2	2	2	2	2	2	2
1562	6	1	79	6	2	2	2	2	2	2	2	2							1	1	0	0	0	0													1	1	0	0	0	0
1563	2	1	38	2	2	2	2	2	2	2	2	2
1564	6	1	73	6	1	1	2	2	1	2	1	1	1	1	1	0	1	0	1	1	1	1	1	0	1	0	0	0	1	0	1	0	1	0	1	0	1	0	1	1	1	0	1	0	0	0	1	0	1
1565	11	2	60	5	1	2	2	2	2	2	2	2	0	0	0	0	1	0
1566	10	2	58	4	2	2	2	2	2	2	2	2
1567	9	2	42	3	2	2	2	2	1	2	2	2																									1	1	1	0	0	0
1568	9	2	48	3	2	2	2	2	2	2	2	2
1569	2	1	33	2	2	1	2	2	1	2	2	2							0	0	1	0	0	0													0	0	1	0	0	0
1570	2	1	31	2	1	1	1	2	2	2	2	2	0	0	0	0	1	0	0	0	0	0	1	0	0	0	0	0	0	1							0	0	0	0	1	0							0
1571	6	1	74	6	2	2	2	1	2	2	2	2																			1	0	0	0	0	0
1572	9	2	42	3	1	1	2	1	1	2	2	1	0	0	1	0	0	0	0	0	1	0	0	0							1	0	0	0	0	0	0	0	1	0	0	0	0	0	0	0	0	1
1573	5	1	66	5	2	2	2	2	2	2	2	2							1	1	0	0	0	0																			0	0	0	0	0	1	0
1574	10	2	52	4	2	2	2	2	2	2	2	2
1575	8	2	30	2	2	2	2	2	2	2	2	2
1576	11	2	63	5	1	1	2	2	1	2	1	2	0	0	0	0	1	0	0	0	0	0	1	0													0	0	0	0	1	0							0
1577	3	1	43	3	2	2	2	2	2	2	2	2
1578	6	1	76	6	2	2	2	1	2	2	2	1	0	0	0	1	0	0													1	1	0	0	0	0	1	1	0	0	0	0							1
1579	5	1	63	5	2	2	2	2	2	2	2	2	0	0	1	0	0	0																			0	0	1	0	0	0
1580	6	1	74	6	2	2	2	2	2	2	2	2							0	0	0	1	1	0													0	0	0	1	0	0
1581	6	1	75	6	1	2	2	2	2	2	2	2	0	0	0	0	1	0
1582	4	1	51	4	2	2	2	2	2	2	2	2
1583	9	2	48	3	1	1	2	2	1	2	2	2	0	0	1	1	0	0	0	0	1	1	0	0													0	0	1	1	1	0
1584	6	1	70	6	2	2	2	2	2	2	2	2	0	0	0	1	1	0	0	0	0	1	1	0													0	0	0	1	1	0
1585	12	2	74	6	2	2	2	2	2	2	2	2
1586	11	2	63	5	2	2	2	2	2	2	2	2							1	0	0	0	0	0							1	0	0	0	0	0	1	0	0	0	0	0							1
1587	6	1	70	6	2	2	2	2	2	2	2	2
1588	12	2	73	6	2	2	1	2	2	2	2	1							1	1	0	0	0	0	1	1	0	0	0	0	1	1	0	0	0	0	1	1	0	0	0	0
1589	2	1	38	2	2	2	2	2	2	2	2	2
1590	9	2	47	3	2	2	2	2	2	2	2	2
1591	7	2	29	1	2	2	2	2	2	2	2	2
1592	10	2	59	4	1	1	2	2	2	2	2	2	0	0	0	1	1	0	0	0	0	1	1	0
1593	8	2	32	2	2	2	2	1	1	2	1	2	0	0	1	0	0	0													0	0	1	0	0	0	0	0	1	0	0	0							0
1594	12	2	70	6	2	2	2	2	2	2	2	2
1595	10	2	54	4	2	2	2	2	2	2	2	2
1596	10	2	58	4	2	2	2	2	2	2	2	2
1597	7	2	23	1	2	2	2	2	2	2	2	2
1598	8	2	31	2	1	2	2	2	2	2	2	2	0	0	0	0	0	0
1599	3	1	44	3	2	2	2	2	1	2	2	2																									0	0	0	0	1	0
1600	6	1	76	6	1	2	2	2	2	2	2	2	0	0	0	0	1	0																															0
1601	12	2	71	6	2	2	2	2	1	2	2	2																									1	1	0	0	1	0
1602	12	2	74	6	1	2	2	2	2	2	2	2	1	0	0	0	0	0																			1	0	0	0	0	0
1603	8	2	37	2	2	2	2	2	2	2	2	2
1604	3	1	40	3	2	2	2	2	1	2	2	2	0	0	0	1	0	0	0	0	0	1	0	0													1	0	0	1	0	0
1605	3	1	43	3	2	2	2	2	2	2	2	2
1606	6	1	70	6	2	2	2	2	2	2	2	2
1607	12	2	71	6	1	1	1	2	1	2	2	2	1	0	1	0	0	0	1	0	1	0	0	0	1	0	0	0	0	0	1	0	1	0	0	0	0	0	1	0	0	0
1608	8	2	34	2	2	2	2	2	2	2	2	2
1609	3	1	43	3	2	1	2	2	2	2	2	2							0	0	0	0	1	0
1610	12	2	76	6	2	2	2	2	2	2	2	2
1611	6	1	73	6	1	1	2	2	1	2	1	2	0	0	0	0	1	0	0	0	0	0	1	0													0	0	0	0	1	0							0
1612	1	1	27	1	2	2	2	2	1	2	2	2																									0	0	0	0	0	1
1613	8	2	36	2	1	2	2	2	2	2	2	2	0	0	0	0	1	0
1614	8	2	30	2	1	1	2	1	1	2	2	2	0	0	0	1	0	0	0	0	0	1	0	0							1	0	0	0	0	0	0	0	0	1	0	0
1615	6	1	74	6	2	2	2	2	2	2	2	2																									0	0	0	0	0	0
1616	7	2	24	1	2	2	2	2	2	2	2	2
1617	6	1	71	6	2	2	2	2	2	2	1	2																																					1
1618	2	1	35	2	2	2	2	2	1	2	2	2																									0	0	1	0	1	0
1619	2	1	31	2	2	2	2	2	2	2	2	2	0	0	0	0	0	1	0	0	0	0	0	1													0	0	0	0	0	1
1620	6	1	71	6	2	2	2	2	2	2	2	2							0	0	0	0	1	0							0	0	0	0	0	1	0	0	0	0	0	1							0
1621	1	1	28	1	2	2	2	2	2	2	2	2																			0	0	0	0	0	1
1622	6	1	71	6	2	2	2	2	1	2	2	2																									1	0	0	0	0	0
1623	2	1	39	2	2	2	2	2	2	2	2	2																									0	0	0	1	0	0
1624	5	1	60	5	2	2	2	2	2	2	2	2																									1	1	1	1	1	0
1625	12	2	70	6	2	2	2	2	2	2	2	2
1626	9	2	43	3	2	2	2	2	2	2	2	2
1627	10	2	55	4	2	2	2	2	2	2	2	2	0	0	0	0	0	1	0	0	0	0	0	1							0	0	0	0	0	1
1628	2	1	30	2	2	2	2	2	2	2	2	2
1629	8	2	38	2	2	2	2	2	2	2	2	2	0	0	0	0	1	0	0	0	0	0	1	0
1630	9	2	45	3	2	2	2	2	2	2	1	2																																					1
1631	4	1	58	4	2	2	2	2	2	2	2	2	1	0	1	0	0	0	1	0	0	0	0	0													1	0	1	0	0	0
1632	2	1	38	2	2	2	2	2	2	2	2	2
1633	11	2	67	5	1	2	2	2	2	2	2	2	0	0	0	0	1	0																			1	1	0	0	1	0
1634	6	1	74	6	2	2	2	2	2	2	2	2	0	0	1	0	0	0	0	0	1	0	0	0
1635	11	2	69	5	2	1	2	2	1	2	2	2							0	0	1	1	0	0													1	1	1	1	1	0
1636	7	2	27	1	1	1	2	2	1	2	2	2	0	0	0	0	0	1	0	0	0	0	0	1													0	0	0	0	0	1
1637	7	2	22	1	2	2	2	2	2	2	2	2
1638	8	2	30	2	2	2	2	2	2	2	2	2
1639	2	1	34	2	2	2	2	2	2	2	2	2
1640	5	1	66	5	2	2	2	2	2	2	2	2	0	0	0	1	0	0	0	0	0	1	0	0							0	0	0	1	0	0	0	0	0	1	0	0	0	0	0	1	0	0	0
1641	4	1	58	4	1	1	1	1	1	1	1	1	0	0	0	0	0	1	0	0	0	0	0	1	0	0	0	0	0	1	0	0	0	0	0	1	0	0	0	0	0	1	0	0	0	0	0	1	0
1642	4	1	55	4	2	2	2	2	2	2	2	2																									0	0	0	0	1	0
1643	7	2	23	1	2	2	2	2	2	2	2	2
1644	12	2	79	6	2	2	2	2	2	2	2	2
1645	10	2	55	4	2	1	2	1	2	2	2	2							0	0	1	0	1	0							0	0	1	0	0	0
1646	7	2	27	1	2	2	2	2	2	2	2	2
1647	10	2	59	4	2	2	2	2	2	2	2	2
1648	3	1	44	3	2	2	2	2	2	2	2	2
1649	7	2	27	1	2	2	2	2	2	2	2	2
1650	12	2	71	6	1	1	2	1	1	2	2	1	0	0	0	0	0	1	0	0	0	0	0	1							0	0	0	0	0	1	0	0	0	0	0	1	1	0	0	0	0	0
1651	1	1	21	1	2	2	2	2	2	2	2	2
1652	9	2	44	3	2	2	2	2	2	2	2	2	1	0	0	0	0	0	1	0	0	0	1	0
1653	7	2	27	1	1	1	2	2	1	2	2	2	0	0	1	0	0	0	0	0	1	0	0	0													0	0	1	0	0	0
1654	2	1	30	2	2	2	2	2	2	2	2	2
1655	12	2	72	6	2	2	2	2	2	2	1	2	0	0	0	0	1	0	0	0	0	0	1	0													0	0	0	0	1	0							1
1656	1	1	26	1	2	2	2	2	2	2	2	2
1657	10	2	58	4	1	1	2	2	2	2	2	2	0	0	0	0	0	1	1	0	0	0	0	0
1658	6	1	75	6	1	1	2	2	1	2	2	2	0	0	1	0	0	0	0	0	1	0	0	0													0	0	1	0	0	0							0
1659	5	1	65	5	2	2	2	2	2	2	2	2
1660	11	2	62	5	2	2	2	2	2	2	2	2
1661	12	2	75	6	2	2	2	2	2	2	2	2	1	0	0	1	0	0	1	0	0	1	0	0							1	0	0	1	0	0	1	0	0	1	0	0							1
1662	6	1	72	6	2	2	2	2	2	2	2	2
1663	6	1	71	6	2	2	2	2	2	2	2	2
1664	2	1	39	2	2	2	2	2	2	2	2	2
1665	2	1	37	2	2	2	2	2	2	2	2	2
1666	12	2	73	6	2	2	2	2	2	2	2	2
1667	12	2	77	6	2	2	2	2	2	2	1	2																																					0
1668	6	1	71	6	2	2	2	2	1	2	1	2																									1	0	0	0	0	0							0
1669	7	2	23	1	2	2	2	2	2	2	2	2
1670	12	2	72	6	2	2	2	2	2	2	2	2							0	0	0	0	1	0
1671	2	1	33	2	2	2	2	2	2	2	2	2	0	0	0	0	0	1
1672	7	2	25	1	2	2	2	2	2	2	2	2
1673	10	2	55	4	2	2	2	2	2	2	2	2
1674	8	2	30	2	2	2	2	2	2	2	2	2
1675	12	2	71	6	2	2	1	2	2	2	2	2							1	1	0	0	0	0	0	0	0	0	0	1	0	0	0	0	0	1	1	0	0	0	0	0	1	0	0	0	0	0	0
1676	2	1	33	2	2	2	2	2	2	2	2	2	0	0	0	1	0	0																			0	0	0	1	0	0							0
1677	5	1	64	5	1	1	2	2	2	2	2	2	0	0	0	1	0	0	0	0	0	1	0	0
1678	6	1	74	6	2	2	2	2	2	2	2	2																																					0
1679	2	1	38	2	1	1	1	1	1	2	2	1	0	0	0	0	1	0	0	0	0	0	1	0	0	0	0	0	1	0	0	0	0	0	1	0	0	0	0	0	1	0
1680	3	1	48	3	2	2	2	2	2	2	2	2
1681	2	1	38	2	2	2	2	2	2	2	2	2
1682	12	2	72	6	2	2	2	2	2	2	2	2
1683	1	1	28	1	2	2	2	2	2	2	2	2
1684	10	2	56	4	2	2	2	2	2	2	2	2	1	1	0	0	0	0	1	1	0	0	0	0	1	0	1	0	0	0	0	0	1	0	0	0							0	0	1	0	0	0	0
1685	4	1	53	4	1	1	1	1	1	1	1	1	0	0	0	0	1	0	0	0	0	0	1	0	0	0	0	0	1	0	0	0	0	0	1	0	0	0	0	0	1	0	0	0	0	0	1	0	0
1686	5	1	62	5	2	2	2	2	2	2	2	2							1	1	1	0	1	0	1	0	1	0	1	0							1	0	1	0	1	0							1
1687	7	2	23	1	2	2	2	1	2	2	2	2																			1	0	0	0	0	0
1688	10	2	51	4	2	2	2	2	2	2	2	2	0	0	0	0	1	0	0	0	0	0	1	0													0	0	0	0	1	0
1689	6	1	73	6	2	1	2	2	1	1	1	1							0	0	1	0	0	0	0	0	1	0	0	0	0	0	1	0	0	0	0	0	1	0	0	0	0	0	1	0	0	0	0
1690	6	1	70	6	2	1	2	2	2	2	1	2							0	0	0	0	1	0																									0
1691	11	2	69	5	2	2	2	2	2	2	2	2
1692	4	1	57	4	2	2	2	2	2	2	2	2							1	1	0	0	0	0
1693	10	2	50	4	2	2	2	2	2	2	2	2	0	0	0	0	0	1
1694	2	1	35	2	1	1	2	2	1	2	2	2	1	0	0	0	0	0	1	0	0	0	0	0													1	0	0	0	0	0
1695	5	1	60	5	1	1	1	1	1	2	1	2	0	0	1	0	1	0	0	0	1	0	1	0	0	0	1	0	1	0	0	0	1	0	0	0	0	0	1	1	1	0							1
1696	12	2	70	6	2	2	2	2	2	2	2	2
1697	7	2	27	1	2	2	2	2	2	2	2	2
1698	5	1	69	5	2	2	2	2	2	2	2	2
1699	4	1	53	4	2	2	2	2	2	2	2	2							0	0	0	1	1	0
1700	2	1	36	2	2	2	2	2	2	2	2	2
1701	3	1	48	3	2	2	2	2	2	2	2	2
1702	7	2	27	1	2	2	2	2	2	2	2	2																															0	0	0	0	0	1
1703	7	2	22	1	2	2	2	2	2	2	2	2	0	0	0	0	0	1	0	0	0	0	0	1													0	0	0	0	0	1
1704	3	1	49	3	1	1	1	1	1	2	1	2	0	0	0	0	1	0	0	0	0	0	1	0	0	0	0	0	1	0	0	0	0	0	1	0	0	0	0	0	1	0	0	0	0	0	1	0	0
1705	12	2	72	6	1	1	2	2	2	2	2	2	0	0	0	1	1	0	0	0	0	1	1	0
1706	8	2	39	2	1	1	2	2	1	2	2	2	1	0	0	0	0	0	1	0	1	1	0	0							0	0	0	0	0	1	1	0	1	0	1	0							0
1707	8	2	31	2	2	2	2	2	2	2	2	2
1708	5	1	69	5	2	2	2	2	2	2	2	2
1709	11	2	68	5	2	1	2	2	2	2	2	2							0	0	0	1	1	0
1710	2	1	34	2	2	2	2	2	2	2	2	2
1711	5	1	67	5	2	2	2	2	2	2	2	2
1712	10	2	53	4	2	2	2	2	2	2	2	2							1	0	0	0	0	0
1713	2	1	30	2	1	2	2	2	2	2	2	2	0	0	0	0	0	1	0	0	0	0	0	1
1714	8	2	39	2	1	1	2	1	1	2	2	2	0	0	1	0	0	0	0	0	1	0	0	0							0	0	0	0	0	1	0	0	1	0	0	0
1715	7	2	27	1	2	2	2	2	2	2	2	2
1716	8	2	36	2	2	2	2	2	2	2	2	2																									1	1	0	1	1	0
1717	5	1	61	5	2	2	2	2	2	2	2	2																									1	1	0	0	1	0
1718	5	1	61	5	2	2	2	2	2	2	2	2
1719	10	2	51	4	2	2	2	2	2	2	2	2
1720	12	2	72	6	2	2	2	2	2	2	2	2
1721	11	2	60	5	2	2	2	2	2	2	2	2	0	0	0	0	1	0	0	0	0	0	1	0
1722	10	2	58	4	1	1	2	1	2	1	2	2	0	0	0	0	1	0	0	0	0	0	1	0							1	0	0	0	0	0	1	0	0	0	0	0	1	0	0	0	0	0
1723	5	1	60	5	2	2	2	2	2	2	2	2
1724	12	2	71	6	2	2	2	2	1	1	2	2													1	1	0	0	1	0	0	0	0	0	1	0	0	0	1	1	1	0	1	0	0	0	1	0	0
1725	4	1	52	4	2	1	2	2	1	2	2	2							0	0	1	1	0	0													0	0	1	1	0	0
1726	12	2	72	6	2	2	2	2	2	2	2	2							0	0	0	0	1	0	0	0	0	0	0	0	0	0	0	0	0	0							0	0	0	0	0	0
1727	12	2	70	6	2	2	2	2	2	2	2	2																																					0
1728	8	2	37	2	2	2	2	2	2	2	2	2
1729	12	2	72	6	1	1	2	2	1	1	2	2	0	0	0	0	1	0	0	0	0	0	1	0													0	0	0	0	1	0	0	0	0	0	0	1
1730	12	2	70	6	2	2	2	2	2	2	2	2
1731	1	1	21	1	1	2	2	2	1	2	2	2	0	0	0	0	1	0																			0	0	0	0	1	0
1732	5	1	63	5	2	2	2	2	1	2	2	1																									1	0	0	0	0	0
1733	12	2	72	6	2	2	2	2	2	2	2	2
1734	2	1	38	2	1	1	1	1	1	1	2	2	1	0	1	1	1	0	1	0	1	1	1	0	1	0	1	1	1	0	1	0	1	1	1	0	1	0	1	1	1	0	0	0	0	1	1	0	0
1735	11	2	64	5	1	1	2	2	1	2	1	2	0	0	0	0	1	0	0	0	0	0	1	0													1	1	0	0	1	0							1
1736	1	1	28	1	2	2	2	2	2	2	2	2
1737	10	2	57	4	2	2	2	2	2	2	2	2
1738	9	2	49	3	2	2	2	2	2	2	2	2																			1	0	0	0	0	0	1	1	1	1	0	0							0
1739	2	1	31	2	2	2	2	2	2	2	2	2
1740	1	1	29	1	2	2	2	2	2	2	2	2	1	0	0	0	1	0	1	0	0	0	1	0													1	0	0	0	1	0							1
1741	12	2	70	6	2	1	2	2	2	2	2	2							0	0	1	0	0	0
1742	7	2	22	1	2	2	2	2	2	2	2	2
1743	11	2	61	5	2	2	2	2	2	2	2	2	0	0	0	0	0	1	0	0	0	0	0	1
1744	12	2	77	6	2	2	2	1	2	2	2	2																			1	0	0	0	0	0
1745	10	2	50	4	2	2	1	2	2	2	2	2													0	0	0	0	1	0							0	0	0	0	1	0	0	0	0	0	0	1
1746	12	2	72	6	2	2	2	2	2	2	2	2							0	0	0	0	1	0													0	0	0	0	1	0
1747	8	2	33	2	2	2	2	2	2	2	2	2
1748	8	2	34	2	2	2	2	2	2	2	2	2																															1	0	1	0	0	0
1749	11	2	68	5	2	2	2	2	2	2	2	2
1750	9	2	47	3	2	2	2	2	2	2	2	2																									1	1	1	1	1	0
1751	9	2	44	3	2	2	2	2	2	2	2	2
1752	2	1	36	2	2	2	2	2	2	2	2	2
1753	2	1	39	2	2	2	2	2	2	2	2	2
1754	8	2	30	2	1	1	2	2	1	2	2	2	0	0	0	1	0	0	0	0	0	1	0	0													0	0	0	1	0	0
1755	7	2	27	1	1	1	2	1	1	2	2	2	0	0	1	0	0	0	0	0	1	0	0	0							0	0	0	0	0	1	0	0	1	0	0	0
1756	9	2	45	3	2	2	2	2	2	2	2	2	1	0	1	1	1	0	0	0	1	1	1	0													0	0	1	1	1	0
1757	11	2	67	5	2	2	2	2	2	2	2	2																			1	1	0	0	0	0													1
1758	10	2	54	4	2	2	2	2	2	2	2	2	1	1	0	0	1	0	1	1	0	0	1	0													1	1	0	0	1	0							0
1759	4	1	53	4	1	1	2	2	2	2	2	2	1	1	0	0	1	0	1	1	0	0	1	0
1760	8	2	34	2	1	1	2	2	1	2	2	2	0	0	1	0	0	0	0	0	1	0	0	0													0	0	1	0	0	0
1761	7	2	20	1	2	2	2	2	2	2	2	2
1762	9	2	42	3	2	2	2	2	1	2	2	2																			1	0	0	0	1	0	1	0	0	0	1	0
1763	12	2	76	6	2	2	2	2	2	2	2	2
1764	2	1	35	2	2	2	2	2	2	2	2	2
1765	8	2	32	2	2	2	2	2	2	2	2	2
1766	12	2	70	6	2	2	2	2	2	2	1	2	1	1	0	0	1	0													1	1	0	0	1	0													1
1767	10	2	54	4	2	2	2	2	2	2	2	2
1768	10	2	58	4	1	1	2	2	2	2	1	2	0	0	0	1	1	0	1	1	0	1	1	0																									1
1769	11	2	62	5	2	2	2	2	2	2	2	2	1	1	1	1	1	0	1	1	1	1	1	0
1770	11	2	60	5	2	2	2	2	2	2	2	2																									0	0	0	0	0	1
1771	2	1	37	2	2	2	2	2	2	2	1	2	0	0	0	0	0	1													0	0	0	0	0	1	0	0	0	0	0	1							0
1772	12	2	71	6	2	2	2	2	2	2	2	2
1773	10	2	59	4	1	1	2	2	1	2	2	2	0	0	1	1	1	0	1	0	1	1	1	0													0	0	0	1	1	0
1774	10	2	57	4	2	2	2	2	2	2	2	2	0	0	0	0	0	1																			0	0	0	0	0	1
1775	7	2	29	1	2	2	2	2	1	2	2	2																									1	0	0	1	1	0
1776	2	1	33	2	2	2	2	2	1	2	2	2																									0	0	0	0	0	1
1777	8	2	33	2	1	1	2	2	1	1	2	2	0	0	0	0	0	1	0	0	0	0	0	1													0	0	0	0	0	1	0	0	0	0	0	1
1778	2	1	32	2	2	2	2	2	2	2	2	2	0	0	0	1	0	0
1779	12	2	71	6	2	2	2	2	2	2	2	2							0	0	0	0	0	1
1780	7	2	21	1	2	2	2	2	2	2	2	1
1781	7	2	28	1	2	1	2	2	2	2	2	2							0	0	0	0	0	1
1782	8	2	33	2	1	1	2	2	1	2	2	2	0	0	0	1	1	0	0	0	0	1	1	0													0	0	0	1	1	0
1783	1	1	26	1	2	2	2	2	2	2	2	2
1784	12	2	73	6	2	2	2	2	2	2	2	2
1785	2	1	37	2	2	2	2	2	2	2	2	2																									0	0	0	0	0	1
1786	2	1	34	2	2	2	2	2	2	2	2	2
1787	1	1	20	1	2	2	2	2	2	2	2	2																									1	1	0	0	1	0
1788	7	2	21	1	2	1	2	2	1	2	2	2							0	0	0	0	0	1													1	0	0	0	0	0
1789	11	2	63	5	2	2	2	2	2	2	2	2																			0	0	0	0	0	1	0	0	0	0	0	1
1790	7	2	21	1	2	2	2	2	2	2	2	2
1791	2	1	30	2	2	2	2	2	2	2	2	2	0	0	0	0	0	1	0	0	0	0	0	1							0	0	0	0	0	1	0	0	0	0	0	1							0
1792	7	2	23	1	2	2	2	2	2	2	2	2
1793	9	2	40	3	1	1	2	2	1	2	1	2	0	0	1	1	1	0	0	0	1	1	1	0													0	0	1	1	1	0							0
1794	2	1	34	2	2	2	2	2	2	2	2	2
1795	10	2	53	4	2	2	2	2	2	2	2	2
1796	9	2	47	3	2	2	2	2	2	2	2	2
1797	2	1	31	2	2	2	2	2	2	2	2	2
1798	3	1	45	3	1	1	2	2	1	2	2	2	1	0	1	1	1	0	1	0	1	1	1	0													1	0	1	1	1	0
1799	2	1	37	2	2	2	2	2	2	2	2	2
1800	10	2	52	4	2	2	2	2	2	1	2	2																									0	0	0	0	1	0	0	0	0	0	1	0	0
1801	10	2	52	4	2	2	2	2	2	2	2	2
1802	10	2	52	4	2	2	2	2	2	2	2	2
1803	3	1	40	3	2	2	2	1	2	2	2	2																			0	0	0	0	0	1	0	0	0	0	0	1
1804	7	2	28	1	2	2	2	2	2	2	2	2	0	0	0	0	1	0																			0	0	0	0	1	0							0
1805	11	2	63	5	2	2	2	2	2	2	2	2
1806	8	2	35	2	1	1	2	2	1	2	2	2	0	0	0	1	0	0	0	0	0	1	0	0													0	0	0	1	0	0
1807	1	1	21	1	2	2	2	2	2	2	2	2
1808	1	1	23	1	2	2	2	2	2	2	2	2
1809	3	1	48	3	2	2	2	2	2	2	2	2
1810	1	1	29	1	1	1	2	2	1	2	2	2	0	0	1	0	0	0	0	0	1	0	0	0													0	0	1	0	0	0
1811	2	1	39	2	2	2	2	2	2	2	2	2
1812	2	1	30	2	2	2	2	2	2	2	2	2
1813	7	2	28	1	2	1	2	2	1	2	2	2							0	0	0	0	0	0													0	0	0	0	0	0
1814	2	1	34	2	2	2	2	2	2	2	2	2
1815	9	2	47	3	2	2	2	2	2	2	2	2
1816	11	2	61	5	2	2	2	2	2	2	2	2	0	0	0	0	1	0	0	0	0	0	1	0													0	0	0	0	0	1	1	0	0	0	0	0	0
1817	11	2	60	5	2	1	2	2	2	2	2	2							0	0	0	0	1	0													0	0	0	0	1	0
1818	4	1	55	4	2	2	2	2	2	2	2	2
1819	8	2	30	2	2	2	2	2	2	2	2	2
1820	1	1	26	1	2	2	2	2	2	2	2	2
1821	2	1	36	2	2	2	2	2	2	2	2	2
1822	1	1	21	1	2	2	2	2	2	2	2	2
1823	9	2	46	3	1	1	2	2	1	2	2	2	0	0	0	0	0	1	0	0	0	0	0	1													0	0	0	0	0	1
1824	7	2	28	1	2	2	2	2	2	2	2	2																									0	0	1	0	0	0
1825	7	2	20	1	2	2	2	2	2	2	2	2
1826	10	2	51	4	2	2	2	2	2	2	2	2
1827	8	2	39	2	2	2	2	2	2	2	2	2
1828	2	1	32	2	2	2	2	2	2	2	2	2
1829	10	2	54	4	2	2	2	2	2	2	2	2	0	0	0	0	1	0	0	0	0	0	1	0
1830	7	2	25	1	2	2	2	2	2	2	2	2
1831	1	1	28	1	2	2	2	2	2	2	2	2
1832	2	1	37	2	2	2	2	2	2	2	2	2
1833	9	2	45	3	2	2	2	2	2	2	2	2																									1	0	0	0	0	0
1834	9	2	49	3	2	2	2	2	2	2	2	2
1835	2	1	36	2	2	2	2	2	2	2	2	2
1836	8	2	31	2	2	2	2	2	2	2	2	2
1837	8	2	32	2	2	2	2	2	2	2	2	2
1838	7	2	25	1	2	2	2	2	1	2	2	2																									0	0	0	0	0	1
1839	10	2	58	4	1	1	2	2	1	2	2	2	1	0	0	1	1	0	0	0	0	1	1	0	0	0	0	0	0	1	1	0	0	0	1	0	1	0	0	1	1	0							1
1840	1	1	23	1	2	2	2	2	2	2	2	2																									1	1	1	1	1	0							1
1841	4	1	57	4	2	2	2	2	2	2	2	2
1842	9	2	43	3	2	2	2	2	2	2	2	2																									0	0	0	0	1	0
1843	8	2	34	2	2	2	2	2	2	2	2	2
1844	8	2	34	2	2	2	2	2	2	2	2	2
1845	10	2	55	4	2	2	2	2	2	2	2	2							0	0	0	0	1	0
1846	2	1	34	2	2	2	2	2	1	2	2	2																			1	1	0	0	0	0	1	1	0	0	0	0
1847	9	2	40	3	2	2	2	2	2	2	2	1
1848	4	1	57	4	1	2	2	2	1	2	1	1	0	0	0	0	0	1																			1	1	0	0	0	0							1
1849	2	1	38	2	2	2	2	2	2	2	2	2	0	0	0	0	0	1	0	0	0	0	0	1													0	0	0	0	0	1	0	0	0	0	0	1
1850	2	1	36	2	2	2	2	2	2	2	2	2
1851	7	2	28	1	2	1	2	2	1	2	2	2	0	0	0	1	0	0	0	0	0	1	0	0													0	0	0	1	0	0
1852	10	2	51	4	1	1	2	1	1	1	1	1	0	0	1	0	0	0	0	0	1	0	0	0							0	0	0	0	1	0	0	0	1	0	0	0	0	0	0	0	0	1	0
1853	1	1	21	1	2	2	2	2	2	2	2	2
1854	9	2	48	3	1	2	2	2	1	2	1	2	0	0	0	0	0	1																			0	0	0	0	0	1							0
1855	2	1	36	2	2	2	2	2	2	2	2	2
1856	7	2	24	1	1	2	2	2	2	2	2	2	0	0	0	0	0	1
1857	1	1	23	1	2	2	2	2	2	2	2	2
1858	7	2	24	1	2	2	2	2	2	2	2	2
1859	7	2	27	1	1	1	2	2	1	2	2	2	0	0	0	0	0	1	0	0	0	0	0	1													0	0	0	0	0	1
1860	4	1	57	4	2	2	2	2	2	2	2	2	0	0	0	0	1	0	0	0	0	0	1	0													0	0	0	0	1	0
1861	11	2	60	5	2	2	2	2	2	2	2	2							0	0	0	0	1	0													1	0	0	0	1	0							1
1862	7	2	27	1	1	1	2	1	2	2	1	1	0	0	0	0	0	0	0	0	1	0	0	0							1	0	0	0	1	0													0
1863	9	2	42	3	2	2	2	1	2	2	2	2																			0	0	0	0	1	0
1864	1	1	24	1	2	2	2	2	2	2	2	2																			1	0	0	0	0	0
1865	11	2	64	5	2	2	2	2	2	2	2	2
1866	1	1	29	1	2	2	2	2	2	2	2	2
1867	9	2	48	3	1	1	2	2	1	1	1	1	0	0	0	0	1	0	0	0	0	0	1	0													0	0	0	0	1	0	0	0	0	0	1	0	0
1868	7	2	25	1	2	2	2	2	2	2	2	2	0	0	0	0	0	1	0	0	0	0	0	1													0	0	0	0	0	1
1869	9	2	43	3	2	2	2	2	2	2	2	2							1	0	0	0	0	0													1	0	0	0	0	0
1870	11	2	69	5	2	2	2	2	2	2	2	2
1871	7	2	24	1	2	2	2	2	1	1	1	1																									1	0	0	0	0	0	1	0	0	0	0	0	1
1872	4	1	52	4	2	2	2	2	2	2	2	2	1	0	0	0	0	0	1	0	0	0	0	0													1	0	0	0	0	0
1873	7	2	26	1	2	2	2	2	2	2	2	2
1874	7	2	25	1	2	2	2	2	1	2	2	2	0	0	0	0	0	1	0	0	0	0	0	1							1	0	0	0	0	0	0	0	0	1	0	0							0
1875	7	2	26	1	2	2	2	2	2	2	2	2
1876	1	1	28	1	1	2	2	2	1	2	2	2	0	0	0	0	0	1																			0	0	0	0	0	1
1877	7	2	27	1	1	1	2	1	1	2	2	2	0	0	0	1	0	0	0	0	0	1	0	0							0	0	0	0	1	0	0	0	0	1	0	0	0	0	0	1	0	0
1878	9	2	47	3	2	2	2	2	2	2	2	2							0	0	0	1	0	0													0	0	0	1	0	0
1879	4	1	56	4	2	2	2	2	2	2	2	2
1880	4	1	58	4	2	2	1	2	1	2	2	2													0	0	0	0	0	1							0	0	0	0	1	0
1881	11	2	65	5	2	2	2	2	2	2	2	2
1882	7	2	25	1	2	2	2	1	1	2	2	2																			1	0	0	0	0	0	1	0	0	0	0	0
1883	3	1	49	3	2	2	2	2	1	2	2	2	1	0	0	0	0	0	1	0	0	0	0	0													1	0	0	0	0	0
1884	1	1	27	1	2	2	2	2	2	2	2	2
1885	1	1	25	1	2	2	2	2	2	2	2	2
1886	3	1	45	3	1	2	1	2	2	2	2	1	0	0	0	0	0	1							1	1	0	0	0	0	0	0	1	0	1	0
1887	7	2	27	1	2	2	2	2	2	2	2	2
1888	7	2	25	1	2	2	2	2	2	2	2	2							0	0	1	0	0	0													0	0	1	0	0	0
1889	11	2	62	5	2	2	2	2	2	2	2	2
1890	9	2	43	3	2	1	2	2	1	1	2	2							0	0	0	1	0	0													0	0	0	1	0	0	0	0	0	1	0	0
1891	9	2	44	3	2	2	2	2	2	2	2	2
1892	4	1	50	4	2	2	2	2	2	2	2	2	0	0	1	1	0	0	0	0	1	1	0	0													0	0	1	1	0	0	0	0	1	1	0	0	1
1893	4	1	52	4	1	1	2	2	2	2	2	2	0	0	0	0	1	0	0	0	0	0	1	0
1894	9	2	44	3	2	2	2	2	2	2	2	2
1895	1	1	23	1	1	1	1	2	1	2	1	1	1	0	0	0	0	0	1	0	0	0	0	0	1	0	0	0	0	0							1	0	0	0	0	0							1
1896	9	2	44	3	2	2	2	2	2	2	2	2																									1	0	0	0	0	0
1897	9	2	48	3	2	2	2	2	2	2	2	2
1898	3	1	44	3	2	2	2	2	2	2	2	2
1899	9	2	45	3	2	1	2	2	1	2	2	2							1	1	0	0	1	0													0	0	0	0	1	0
1900	1	1	24	1	2	2	2	2	2	2	2	2
1901	1	1	29	1	2	2	2	2	2	2	2	2
1902	3	1	45	3	1	1	2	2	2	2	2	2	0	0	0	0	0	1	0	0	0	0	0	1																			0	0	0	0	0	1
1903	9	2	44	3	2	2	2	2	2	2	2	2
1904	1	1	29	1	2	2	2	2	1	2	2	2																									0	0	0	1	0	0
1905	9	2	41	3	2	2	2	2	2	2	2	2
1906	4	1	50	4	2	2	2	2	2	2	2	2
1907	4	1	50	4	2	2	2	2	2	2	2	2							0	0	0	1	0	0
1908	9	2	46	3	2	2	2	2	2	2	2	2
1909	4	1	53	4	2	2	2	1	2	2	2	2																			0	0	1	0	1	0
1910	3	1	49	3	2	2	2	2	2	2	2	2
1911	4	1	54	4	2	2	2	2	2	2	2	2
1912	9	2	46	3	2	2	2	2	2	2	2	2
1913	1	1	21	1	2	2	2	2	1	2	2	2																									0	0	0	0	1	0
1914	3	1	43	3	2	2	2	2	2	2	2	2	1	0	0	0	0	0	0	0	0	0	0	1	0	0	0	0	0	1	1	0	0	0	0	0	1	0	0	0	0	0							0
1915	1	1	29	1	2	2	2	2	2	2	2	2
1916	3	1	49	3	2	1	2	2	2	2	2	2							0	0	0	0	1	0													0	0	0	0	1	0
1917	1	1	29	1	2	2	2	2	2	2	2	2
1918	1	1	22	1	2	2	2	2	2	2	2	2
1919	1	1	25	1	2	2	2	2	2	2	2	2							0	0	0	0	0	1													0	0	0	0	0	1
1920	9	2	41	3	1	1	2	2	1	2	2	2	1	0	1	1	0	0	1	0	1	1	0	0													0	0	1	1	0	0	0	0	1	0	0	0
1921	1	1	27	1	2	2	2	2	2	2	2	2
1922	1	1	21	1	2	2	2	2	2	2	2	2
1923	9	2	44	3	2	2	2	2	2	2	2	2
1924	3	1	48	3	2	2	2	2	2	2	2	2	0	0	0	0	1	0	0	0	0	0	1	0													0	0	0	0	1	0
1925	3	1	42	3	1	2	2	2	2	2	2	2	0	0	0	1	1	0	0	0	0	1	1	0	0	0	0	0	1	0							0	0	1	1	1	0
1926	1	1	26	1	2	2	2	2	2	2	2	2
1927	1	1	21	1	1	1	1	1	1	1	1	1	1	0	0	0	0	0	1	0	0	0	0	0	1	0	0	0	0	0	1	0	0	0	0	0	1	0	0	0	0	0	1	0	0	0	0	0	1
1928	3	1	46	3	2	2	2	2	2	2	2	2							1	0	0	0	0	0
1929	1	1	29	1	1	2	2	2	2	2	2	2	1	0	0	0	0	0	1	0	0	0	0	0
1930	3	1	47	3	2	2	2	2	2	2	2	2
1931	1	1	28	1	2	2	2	2	2	2	2	2
1932	1	1	28	1	2	1	2	2	2	2	2	1							0	0	1	1	0	0
1933	1	1	22	1	2	2	2	2	2	2	2	2
1934	1	1	26	1	2	2	2	2	2	2	2	2	0	0	0	0	0	1
1935	1	1	27	1	1	1	1	2	1	1	1	2	0	0	0	1	1	0	0	0	0	1	1	0	0	0	0	1	1	0							0	0	0	1	1	0	0	0	0	1	1	0	0
1936	1	1	29	1	2	2	2	2	2	2	2	2
1937	3	1	42	3	2	2	2	2	2	2	2	2
1938	1	1	25	1	2	2	2	2	2	2	2	2	0	0	0	0	1	0	0	0	0	0	1	0
1939	1	1	25	1	2	2	2	2	2	2	2	2																									0	0	0	0	0	1
1940	3	1	48	3	2	2	2	2	2	2	2	2
1941	1	1	29	1	2	2	2	2	2	2	2	2																									0	0	0	0	0	1
1942	3	1	46	3	2	2	2	2	2	2	2	2																									0	0	0	0	0	0
1943	3	1	48	3	2	2	2	2	2	2	2	2	0	0	0	0	0	1	0	0	0	0	0	1
1944	3	1	48	3	2	2	2	2	2	2	2	2
1945	3	1	41	3	2	2	2	2	2	2	2	2
1946	3	1	40	3	2	2	2	2	2	2	2	2	0	0	0	0	0	1
[truncated: 11 more columns]
