# Supplementary material for: Prevalence and treatment of chronic musculoskeletal pain focused on service gaps: a comparative analysis by age group and body part
Source: PeerJ journal article supplement (doi:10.7717/peerj.18389), 2024-10-28
Supplement: QuestionnaireJapanese.docx [file QuestionnaireJapanese.docx]

**慢性筋骨格痛に関する研究**

**インフォームド・コンセントフォーム**

以下は慢性疼痛についての質問です。

本研究の目的

本研究の目的は、慢性疼痛の基礎データとして、部位別の保有者割合の現状と保有部位数の年齢層別傾向を明らかにすること、慢性疼痛保有時の対処行動の年齢層別・部位別傾向を明らかにすることです。

個人情報およびデータの取り扱い

　取得したデータおよび個人情報は、研究目的のみに使用します。学会や専門誌等で研究発表を行う場合、データは匿名化されます。データは安全に保管され、外部に漏れることはありません。

実験に参加するメリットとデメリット

本研究は質問紙調査に基づいているため、侵襲的な処置は一切なく、身体的な危険も伴いません。ただし、アンケートに回答する際には、5～15分の時間的制約があります。この時間的拘束は、個人の自由意志によるものであり、個人に精神的・心理的負担がかからないことを明記しています。途中で調査を中断したい場合は、個人の判断で中断することができます。

インフォームド・コンセントを読み、自由意志でこの研究に参加することに同意します

- 同意する
- 同意しません

実験者　　岡　恭正

責任者　　来田　宣幸

**アンケート**

1、性別を選択してください。

- 男性
- 女性

2、あなたの年齢を教えてください。

3、現在を含め、以下の8つの部位のいずれかに慢性的な痛みを感じたことがありますか？慢性の痛みとは、3ヶ月以上続く持続的な痛みと定義されています（毎日でなくても構いません。週に2回以上出現する痛みです）。痛みの程度や強さに関しては、身体がだるい、重いといった軽い痛みも含みます。骨折、打撲、切り傷などの急性外傷は含みません。がんによる痛みも含みません。

首、肩、肘、手首/手、腰、股関節、膝、足首/足

- あり
- なし

4、慢性的な痛みを経験したと回答した箇所についてお答えください。過去に痛みがあったときに対処した行動をすべてチェックしてください。

首、肩、肘、手首/手、腰、股関節、膝、足首/足

- 病院受診
- リハビリテーション
- 鍼灸院・整骨院・整体
- マッサージ
- 自分で対処
